# Supplementary material
Source: publisher figshare collection journal article supplement (https://acs.figshare.com/ndownloader/files/25298535)

## Supporting Information

### Photoinduced Syntheses and Reactivities of Phosphorus-Containing Interelement Compounds

Yuki Yamamoto<sup>†</sup>, Ryo Tanaka<sup>†</sup>, Miyuto Ota<sup>†</sup>, Misaki Nishimura<sup>†</sup>, Cong Chi Tran<sup>†</sup>,

Shin-ichi Kawaguchi<sup>§</sup>, Shintaro Kodama<sup>†</sup>, Akihiro Nomoto<sup>†</sup>, and Akiya Ogawa<sup>†,\*</sup>

<sup>†</sup>*Department of Applied Chemistry, Graduate School of Engineering, Osaka Prefecture University,  
1-1 Gakuen-cho, Nakaku, Sakai, Osaka 599-8531, Japan*

<sup>§</sup>*Center for Education and Research in Agricultural Innovation, Faculty of Agriculture, Saga  
University, 152-1 Shonan-cho Karatsu, Saga 847-0021, Japan*

[ogawa@chem.osakafu-u.ac.jp](mailto:ogawa@chem.osakafu-u.ac.jp)

#### CONTENTS

|                                                                                                                                      | page    |
|--------------------------------------------------------------------------------------------------------------------------------------|---------|
| <b>Table S1.</b> Hammet linear free energy relationship study using <b>1d</b> and <b>20a–20d</b>                                     | S2      |
| Copies of <sup>1</sup> H NMR, <sup>13</sup> C NMR, and <sup>31</sup> P NMR spectra of compounds <b>19a–19e</b>                       | S3–S12  |
| Copies of <sup>1</sup> H NMR, <sup>13</sup> C NMR, <sup>31</sup> P NMR, and <sup>77</sup> Se NMR spectra of compounds <b>20a–20f</b> | S13–S24 |
| Copies of <sup>1</sup> H NMR, <sup>13</sup> C NMR, and <sup>31</sup> P NMR spectra of compound <b>19f</b>                            | S25–S26 |
| Copies of <sup>1</sup> H NMR and <sup>13</sup> C NMR spectra of compound <b>22</b>                                                   | S27     |
| Copies of <sup>1</sup> H NMR, <sup>13</sup> C NMR, and <sup>77</sup> Se NMR spectra of compound <b>23</b>                            | S28–S29 |

**Table S1.** Hammet linear free energy relationship study using **1d** and **20a–20d**

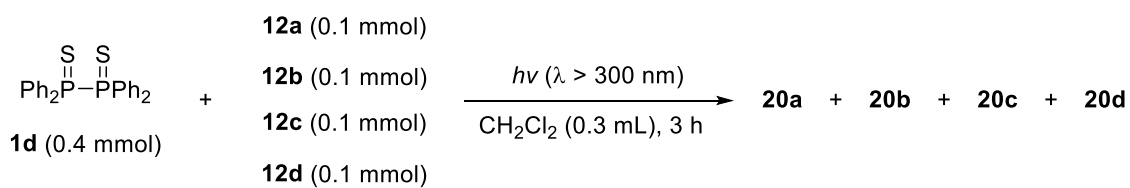

| R                         | <b>20</b> (mmol) <sup>a</sup> | $\sigma_p$ | $\log(k_R/k_H)$ |
|---------------------------|-------------------------------|------------|-----------------|
| <i>p</i> -H               | 0.0105                        | 0          | 0               |
| <i>p</i> -Cl              | 0.0073                        | + 0.227    | -0.162          |
| <i>p</i> -F               | 0.0129                        | +0.062     | 0.093           |
| <i>p</i> -CF <sub>3</sub> | 0.0130                        | +0.540     | 0.094           |

<sup>a</sup>Determined by <sup>31</sup>P NMR.

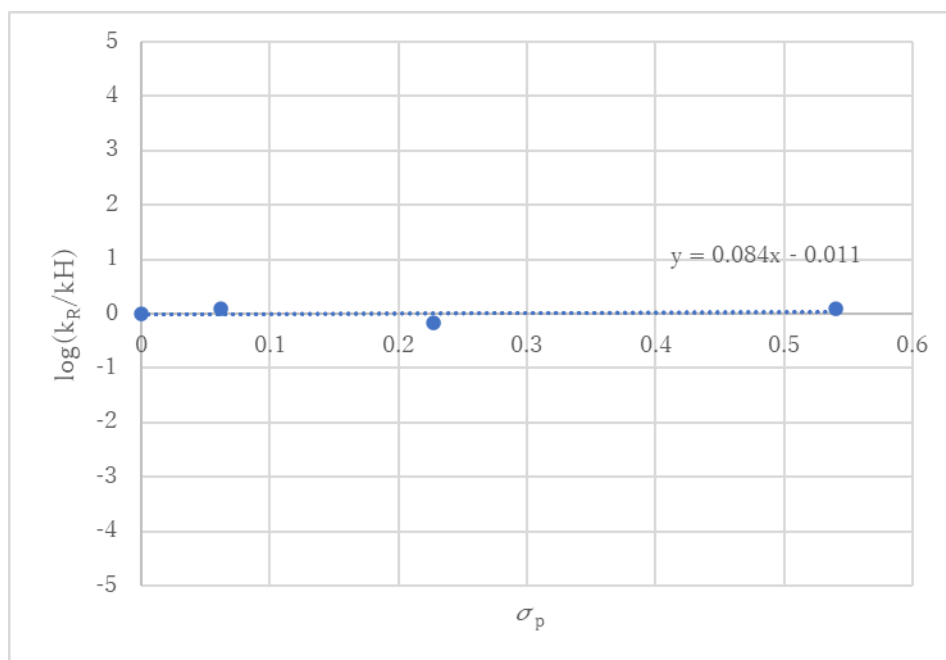

**Figure S1**  $^1\text{H}$ ,  $^{13}\text{C}$ , and  $^{31}\text{P}$  NMR spectra of compound **19a**

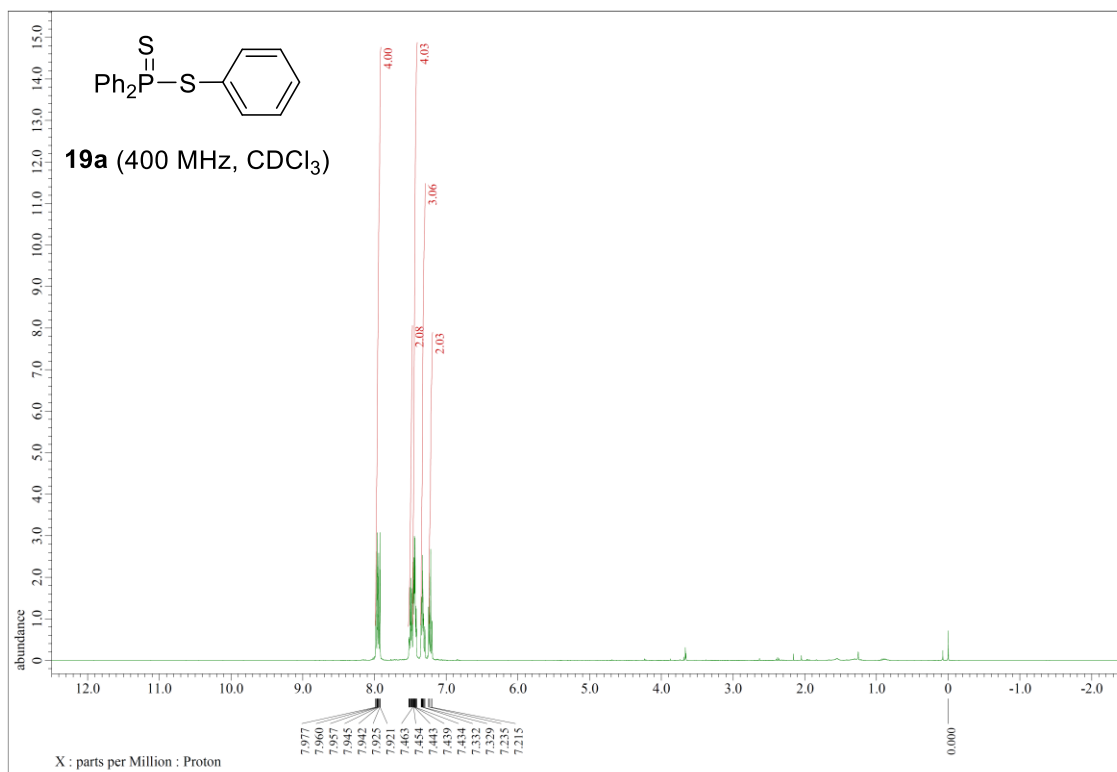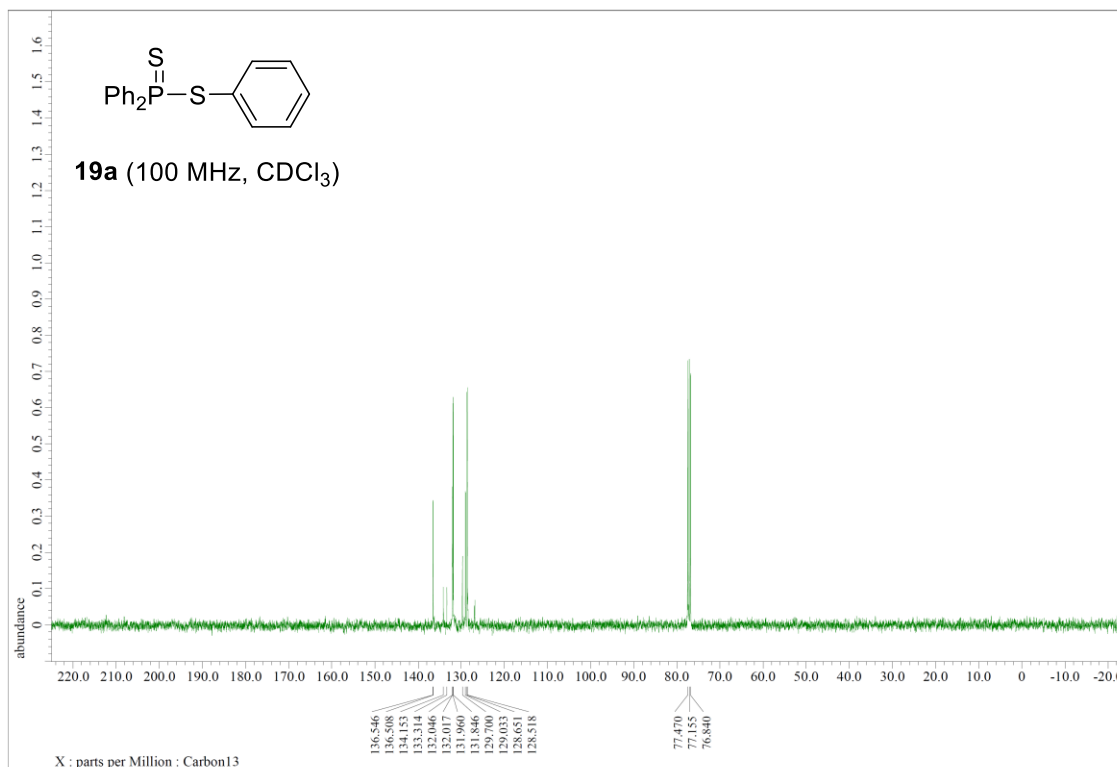

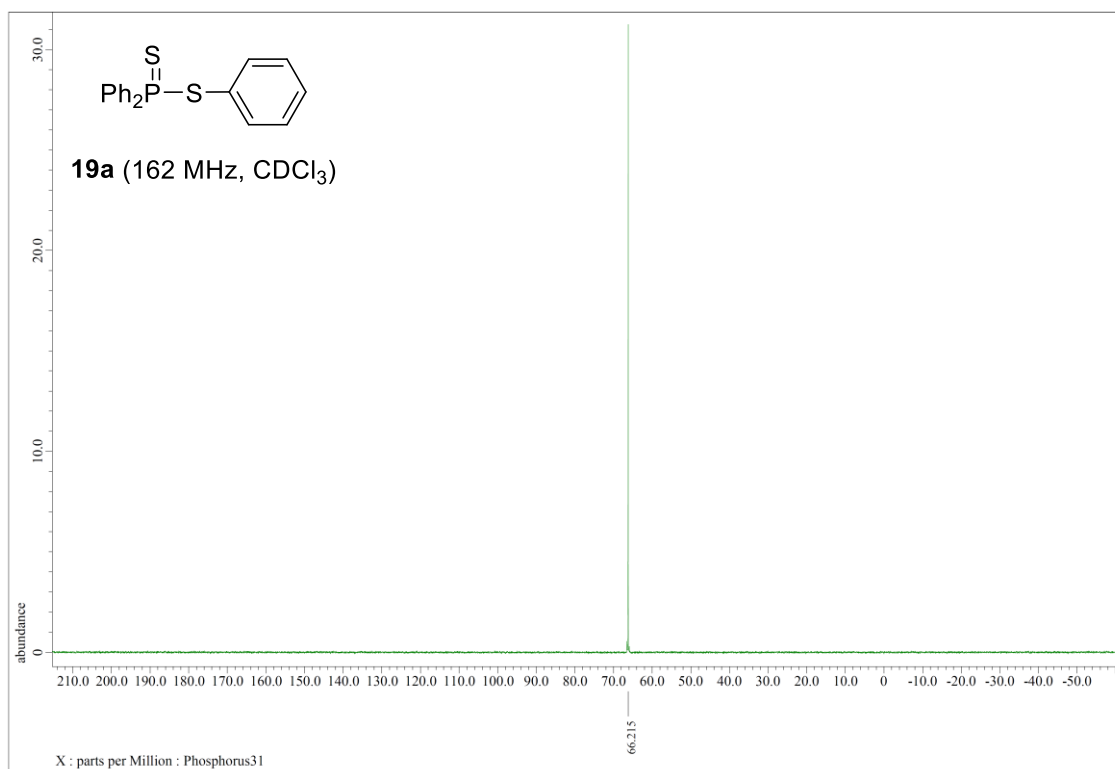

**Figure S2**  $^1\text{H}$ ,  $^{13}\text{C}$ , and  $^{31}\text{P}$  NMR spectra of compound **19b**

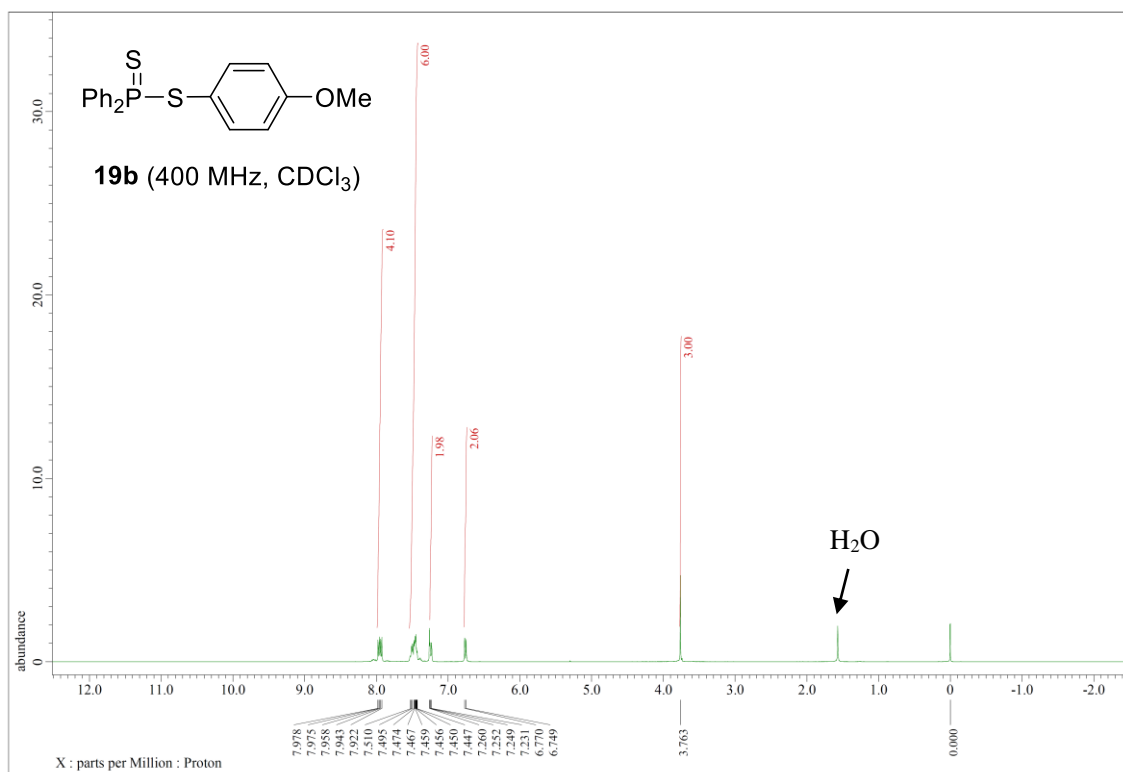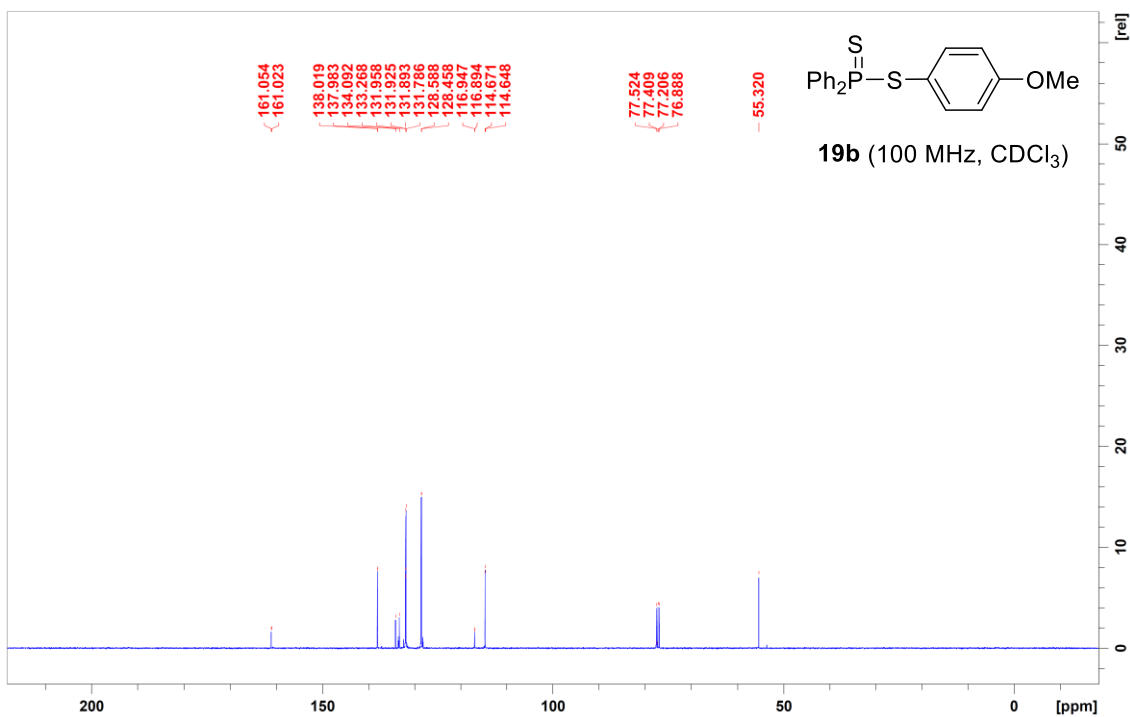

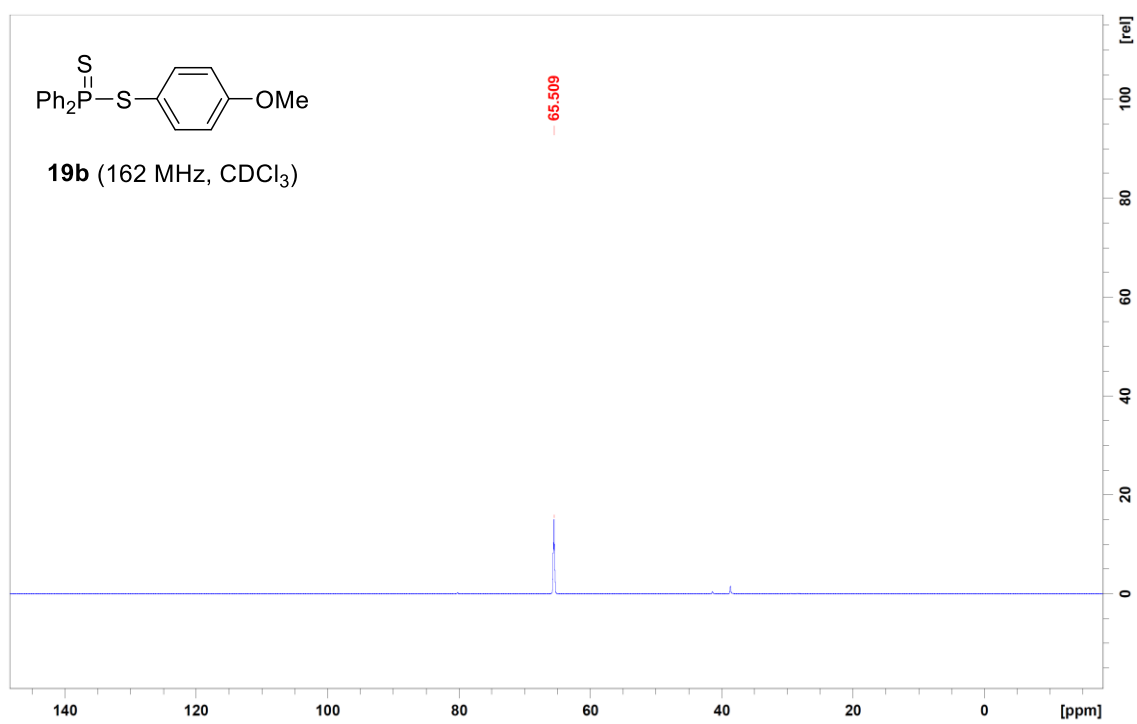

**Figure S3**  $^1\text{H}$ ,  $^{13}\text{C}$ , and  $^{31}\text{P}$  NMR spectra of compound **19c**

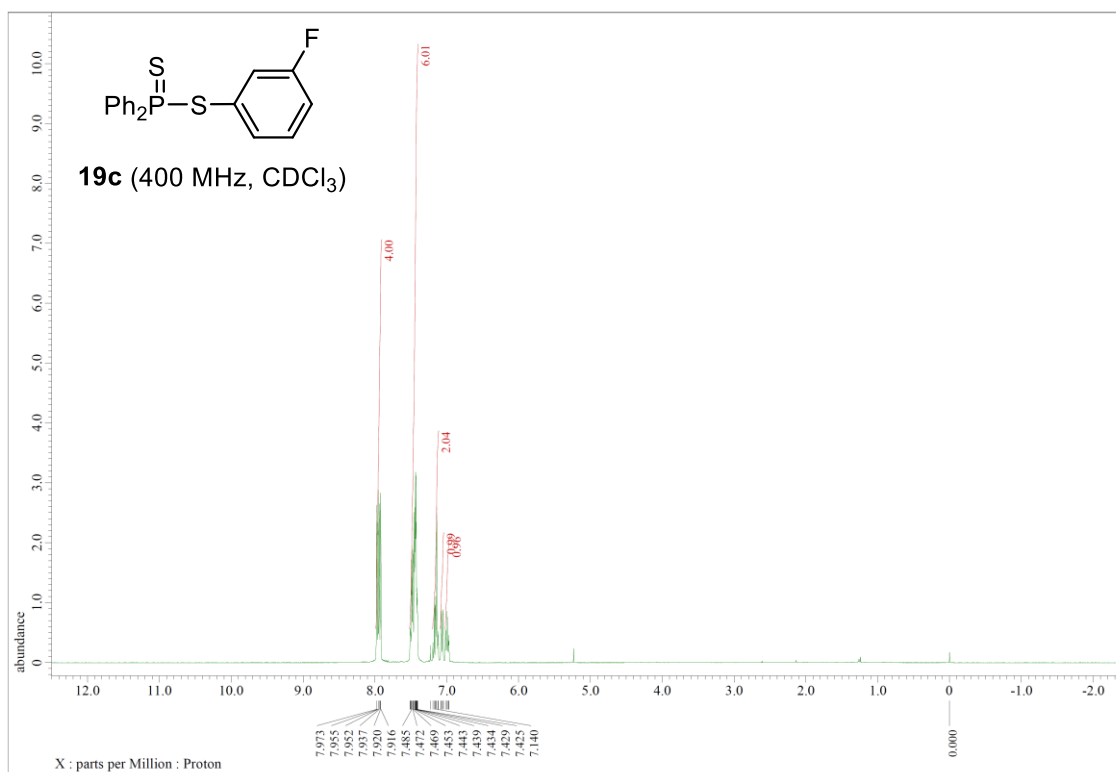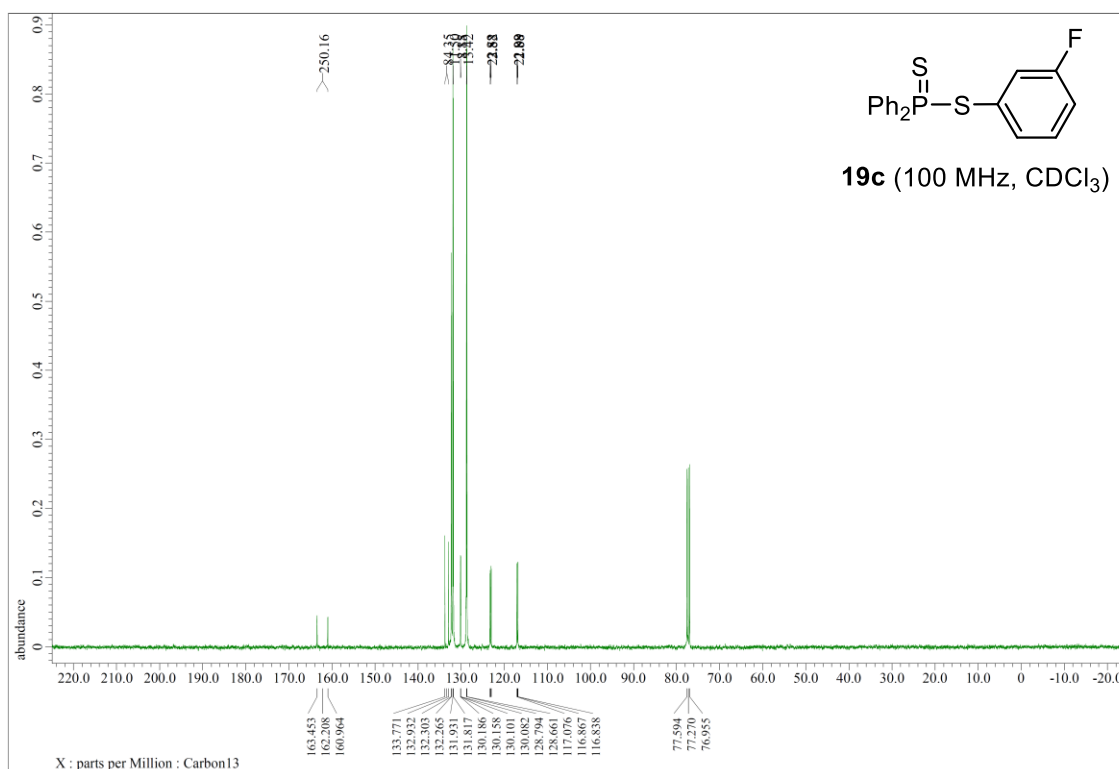

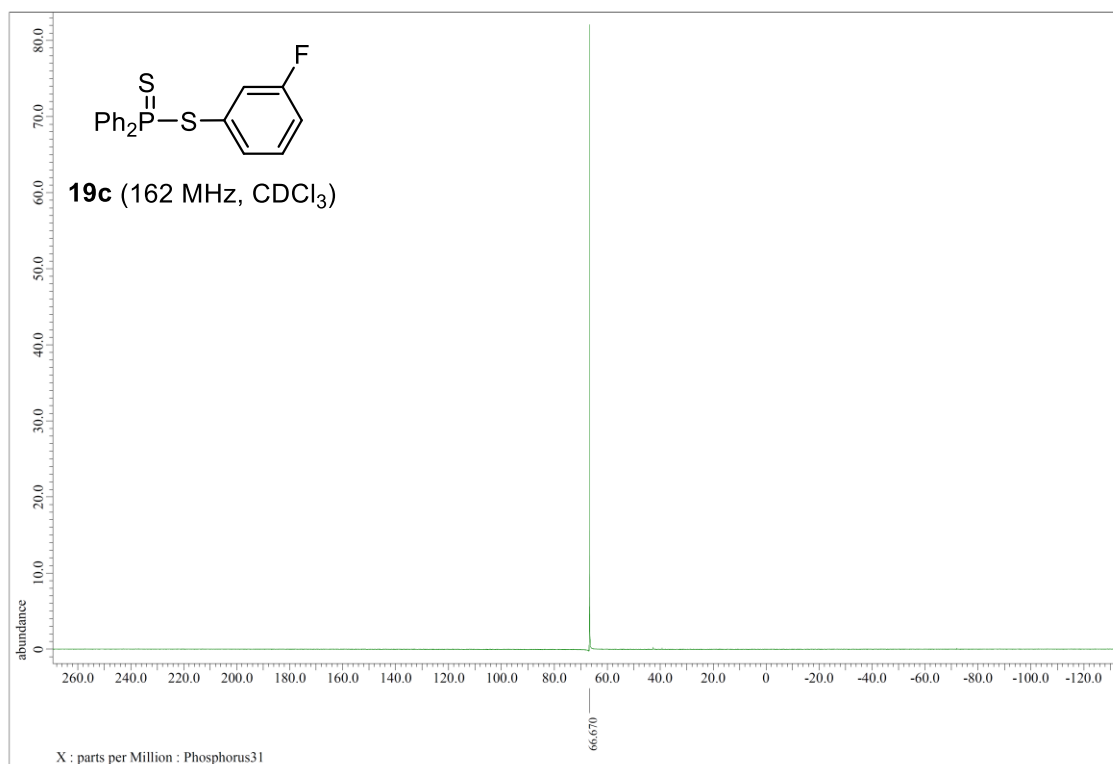



**Figure S4**  $^1\text{H}$ ,  $^{13}\text{C}$ , and  $^{31}\text{P}$  NMR spectra of compound **19d**

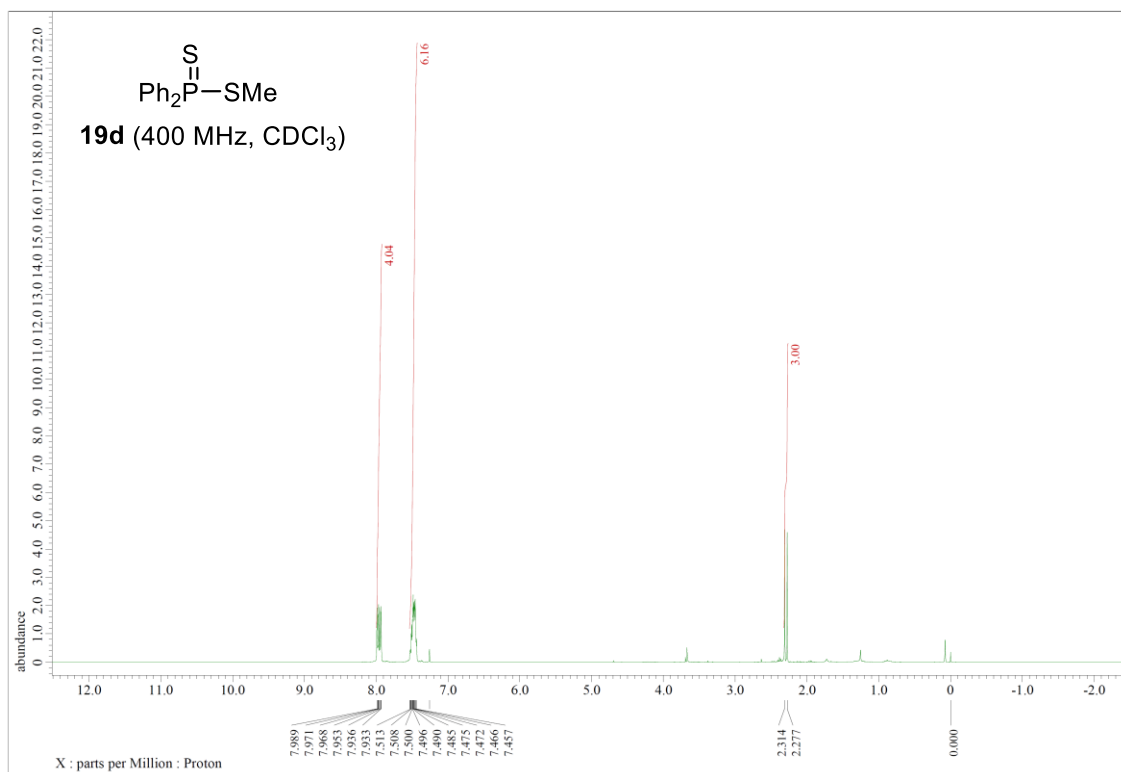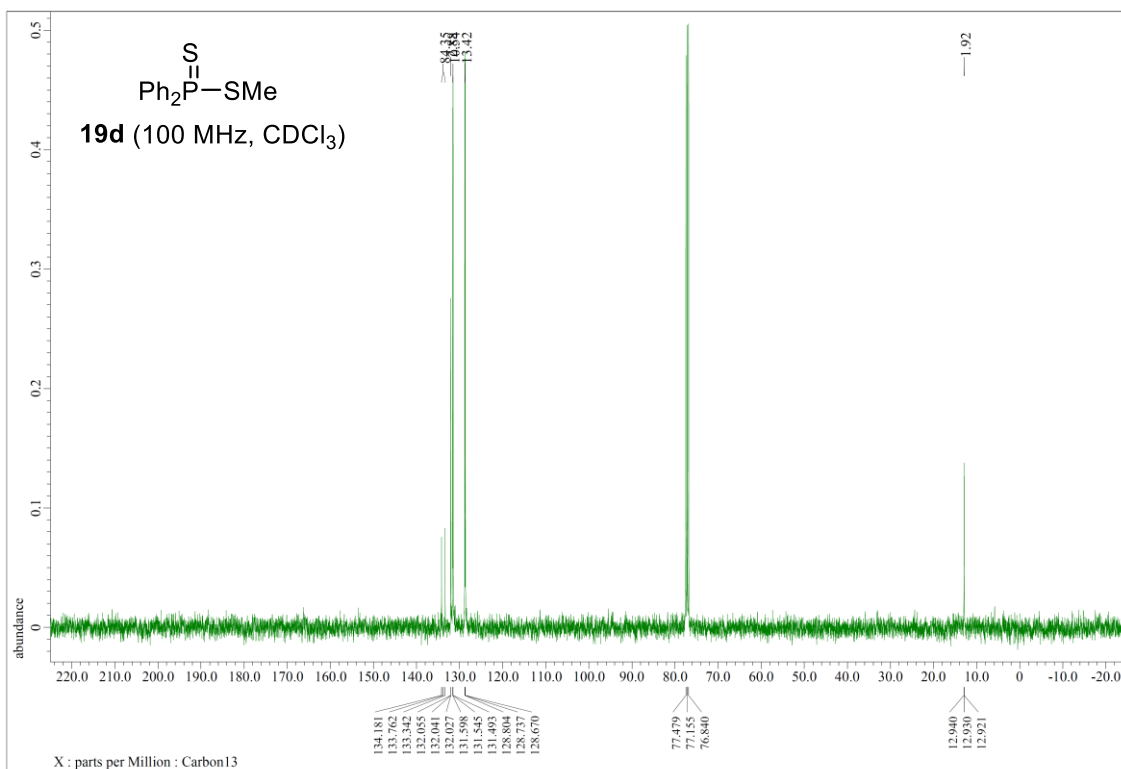

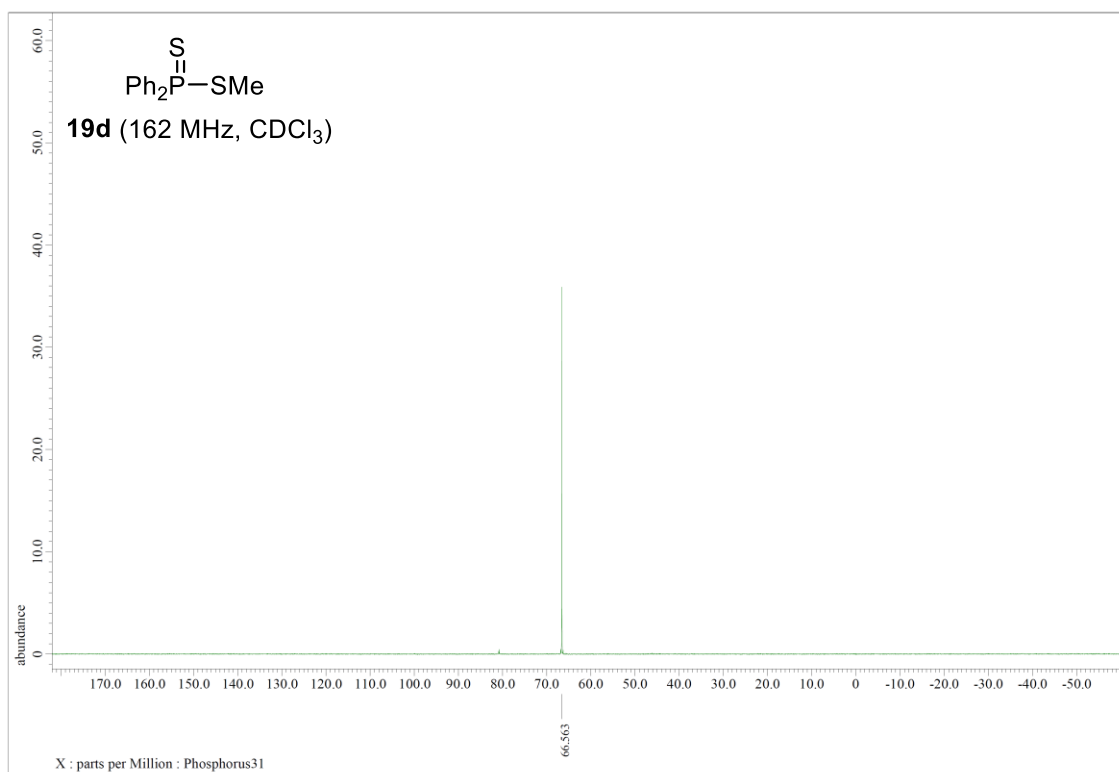

**Figure S5**  $^1\text{H}$ ,  $^{13}\text{C}$ , and  $^{31}\text{P}$  NMR spectra of compound **19e**

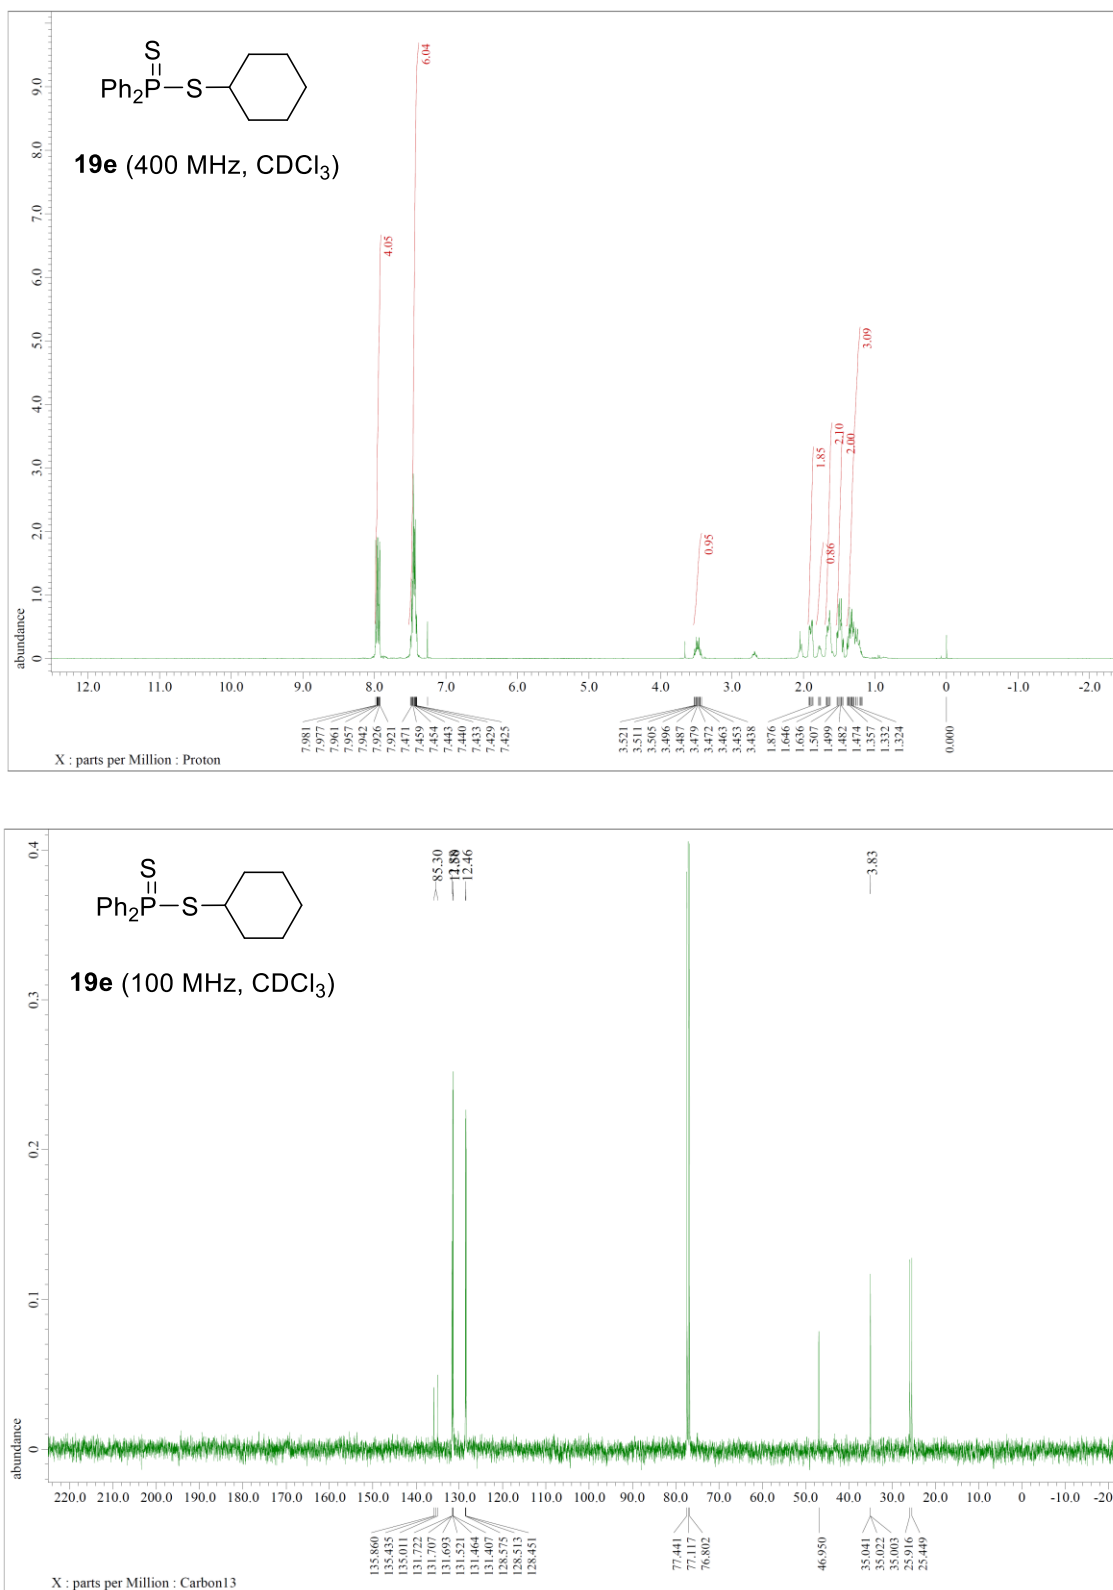

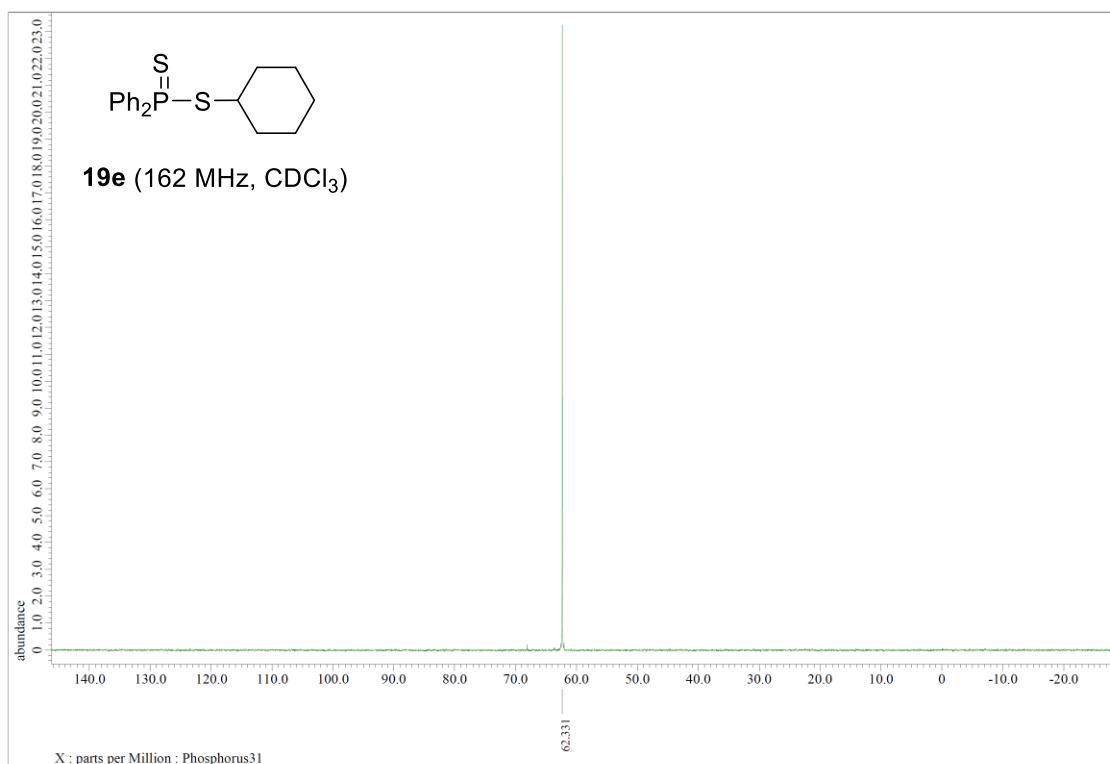

**Figure S6**  $^1\text{H}$ ,  $^{13}\text{C}$ ,  $^{31}\text{P}$ , and  $^{77}\text{Se}$  NMR spectra of compound **20a**

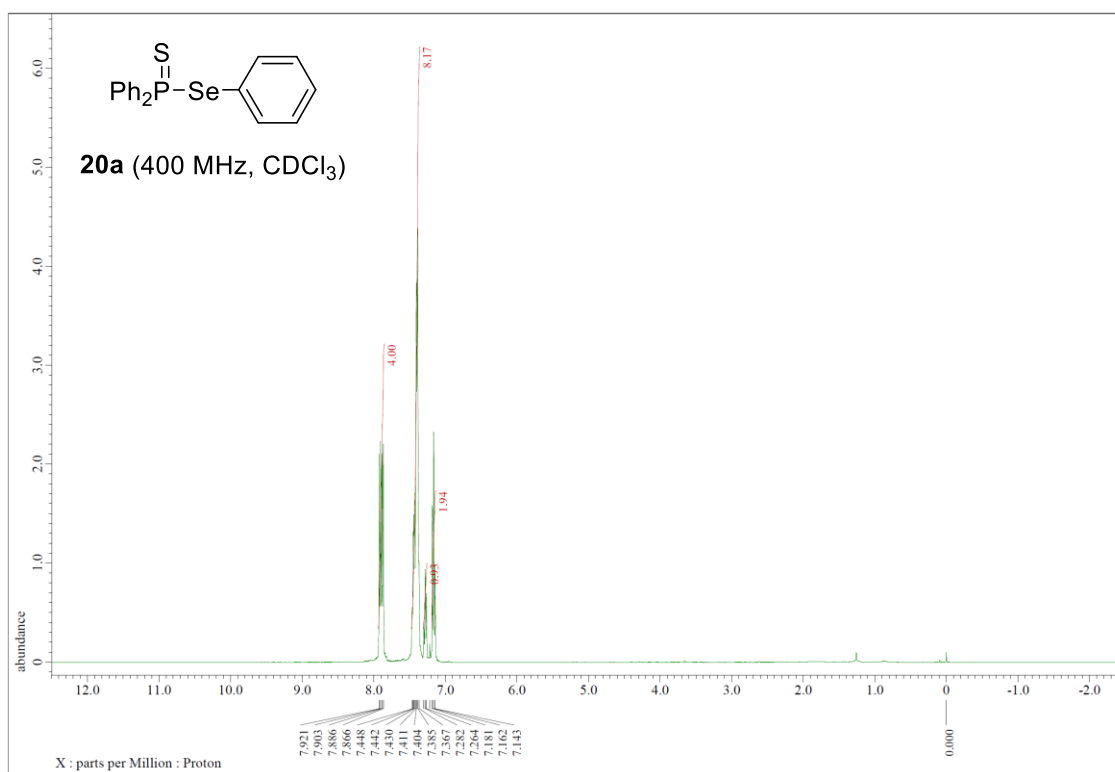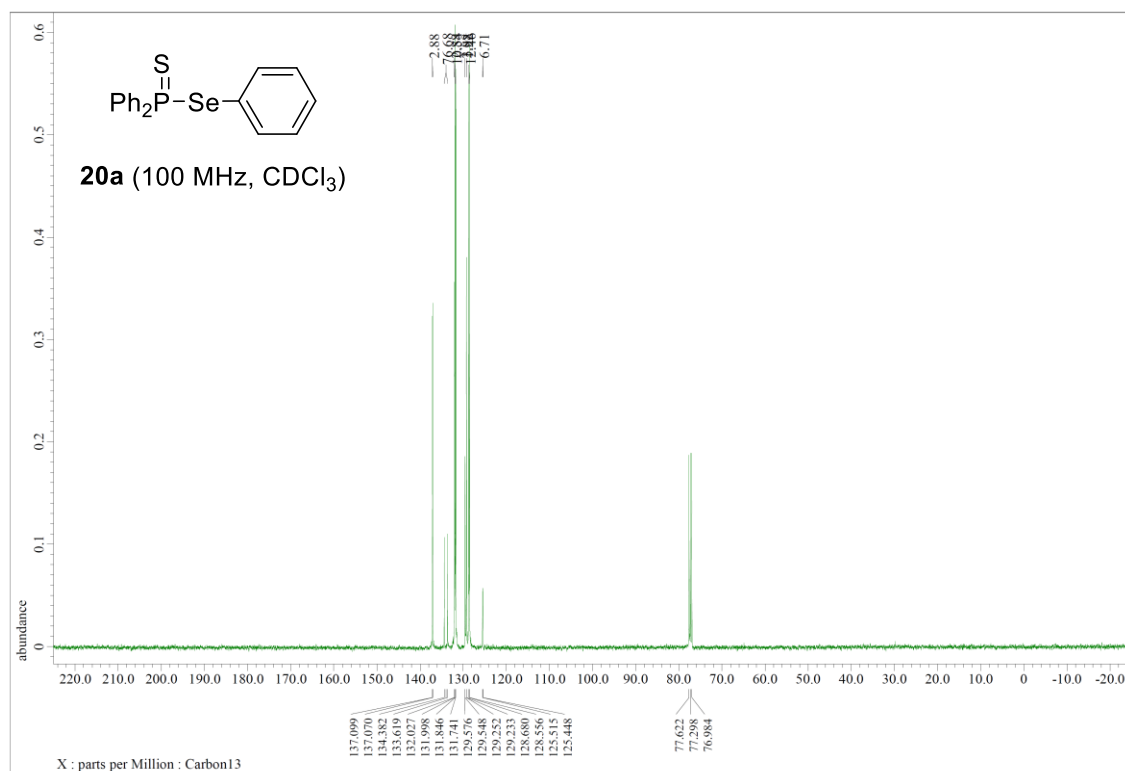

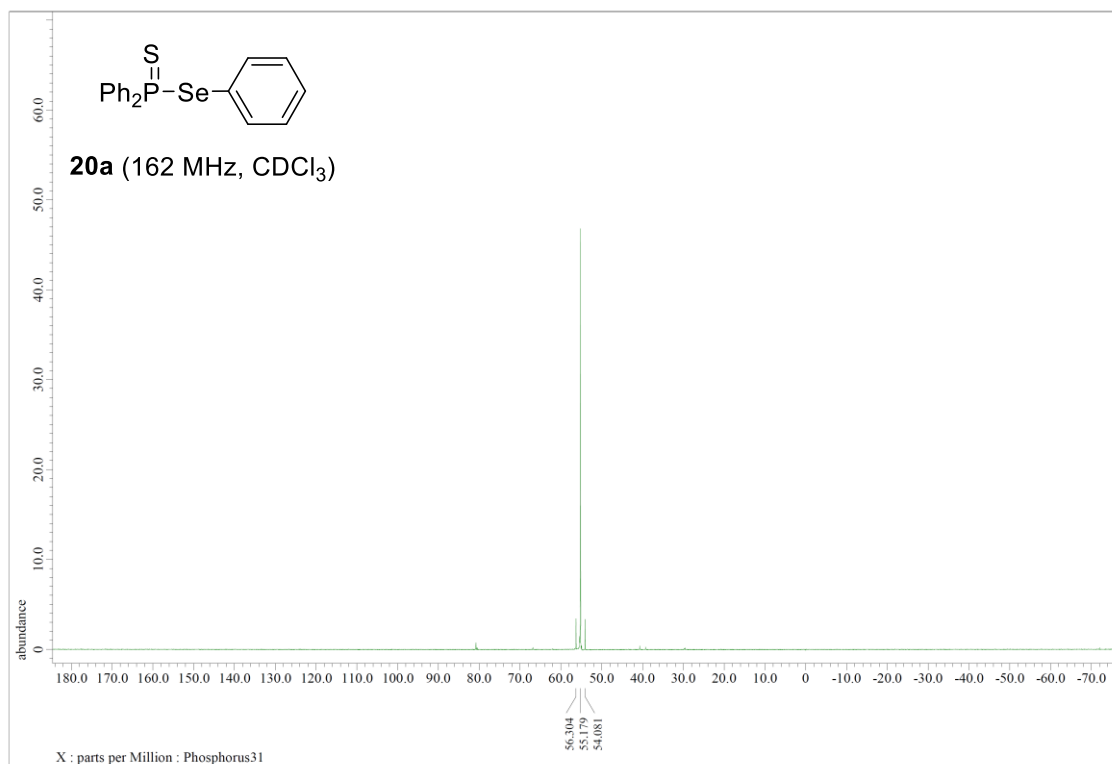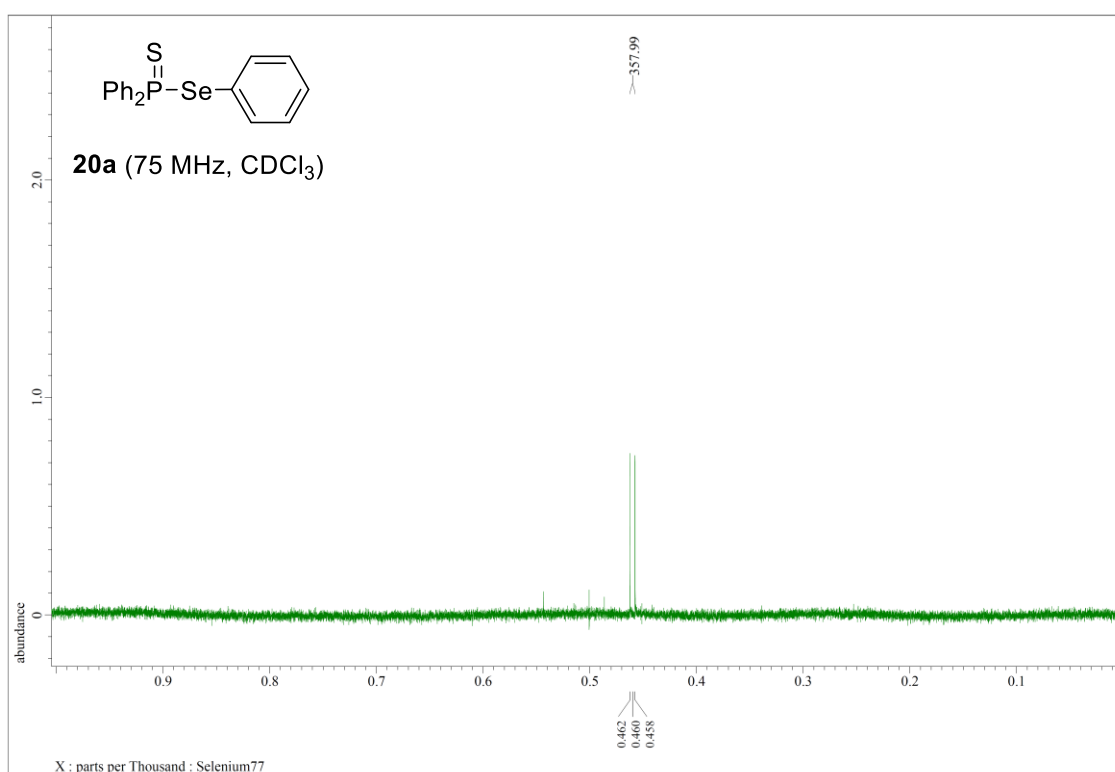

**Figure S7**  $^1\text{H}$ ,  $^{13}\text{C}$ ,  $^{31}\text{P}$ , and  $^{77}\text{Se}$  NMR spectra of compound **20b**

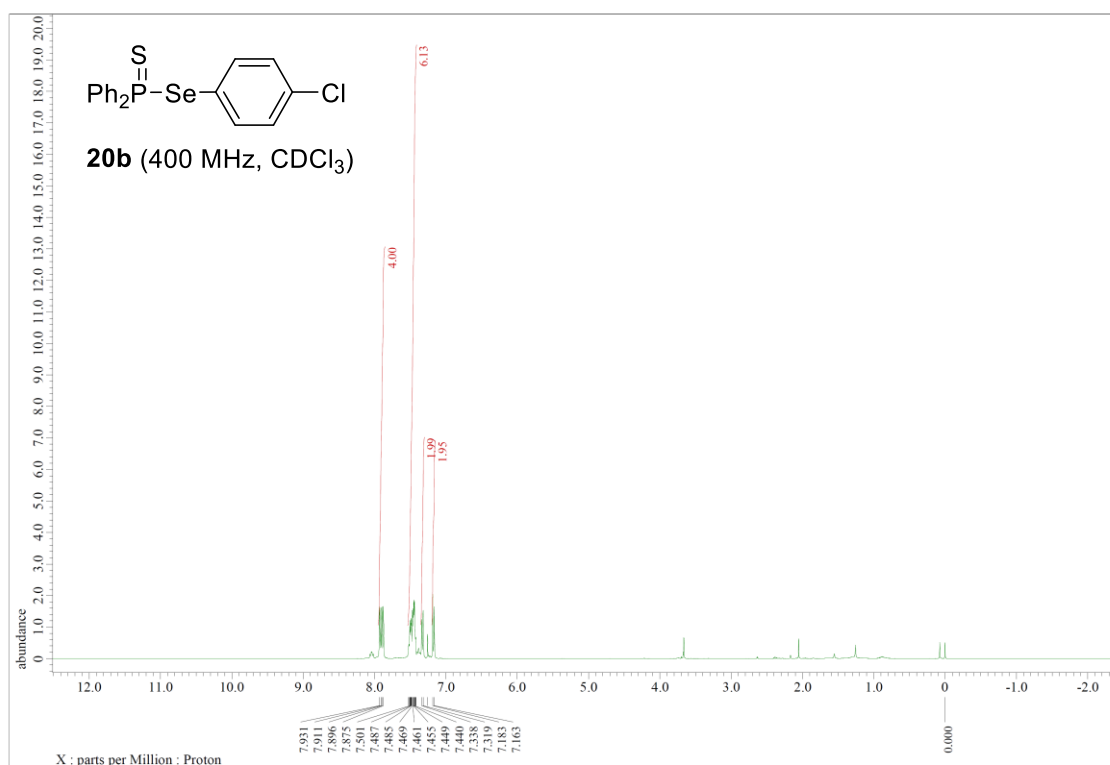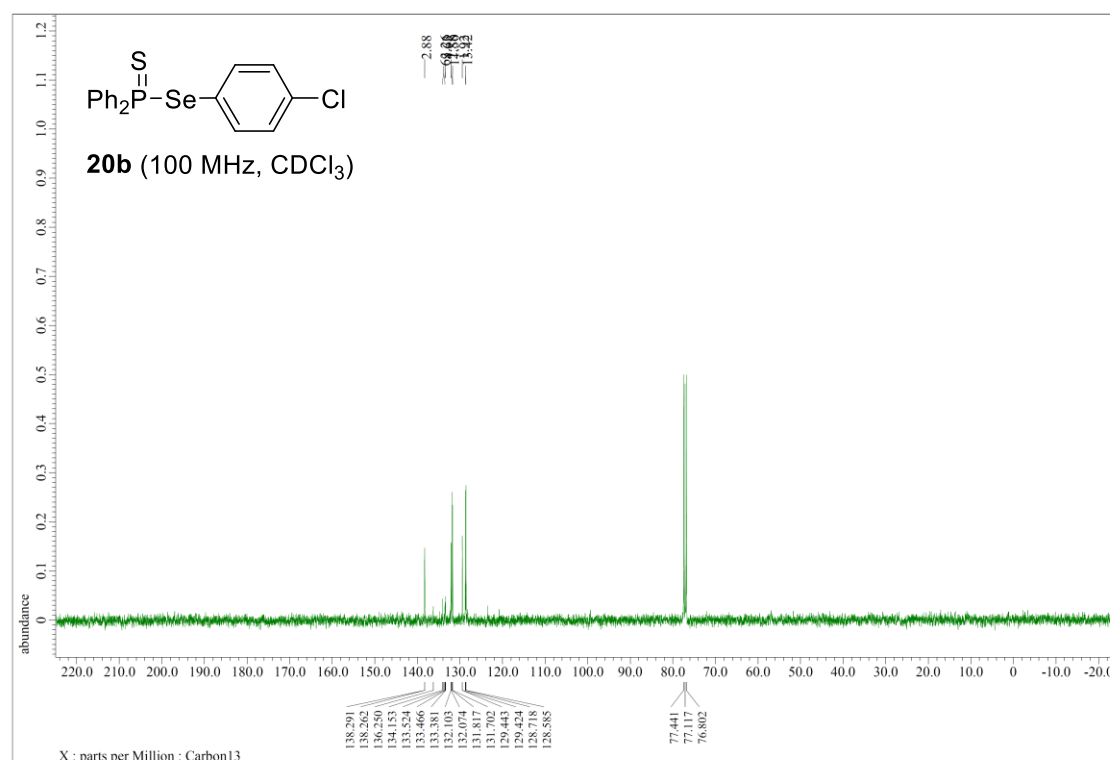

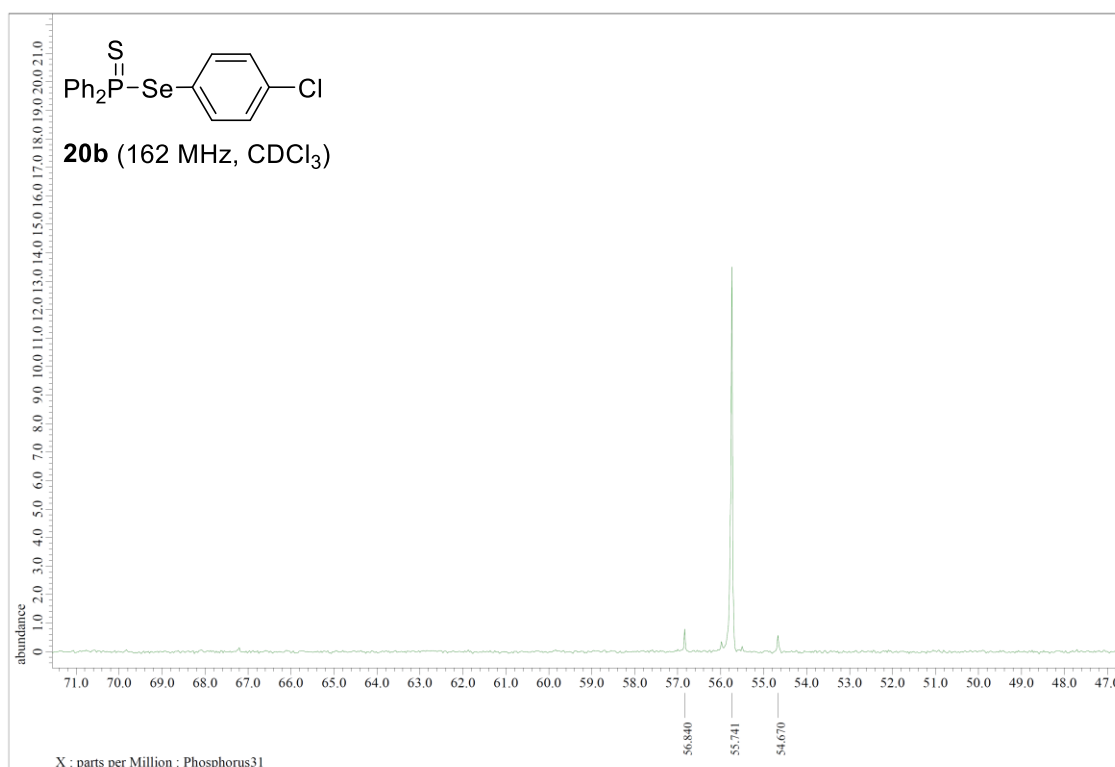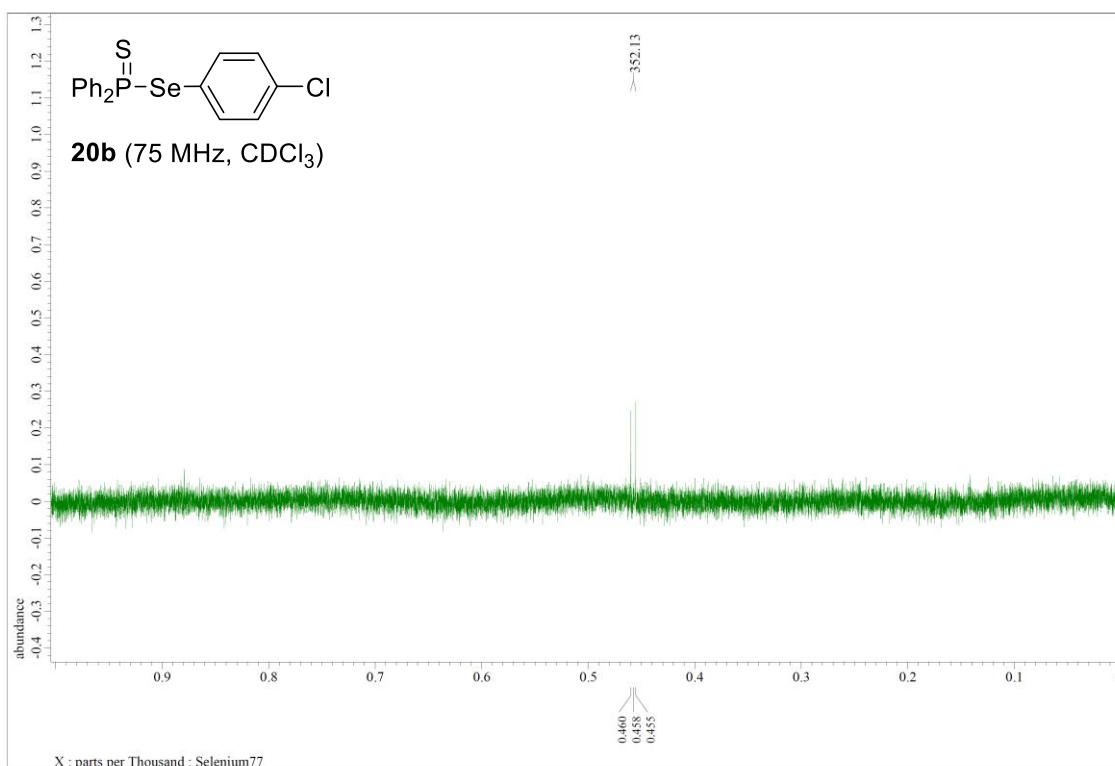



**Figure S8**  $^1\text{H}$ ,  $^{13}\text{C}$ ,  $^{31}\text{P}$ , and  $^{77}\text{Se}$  NMR spectra of compound **20c**

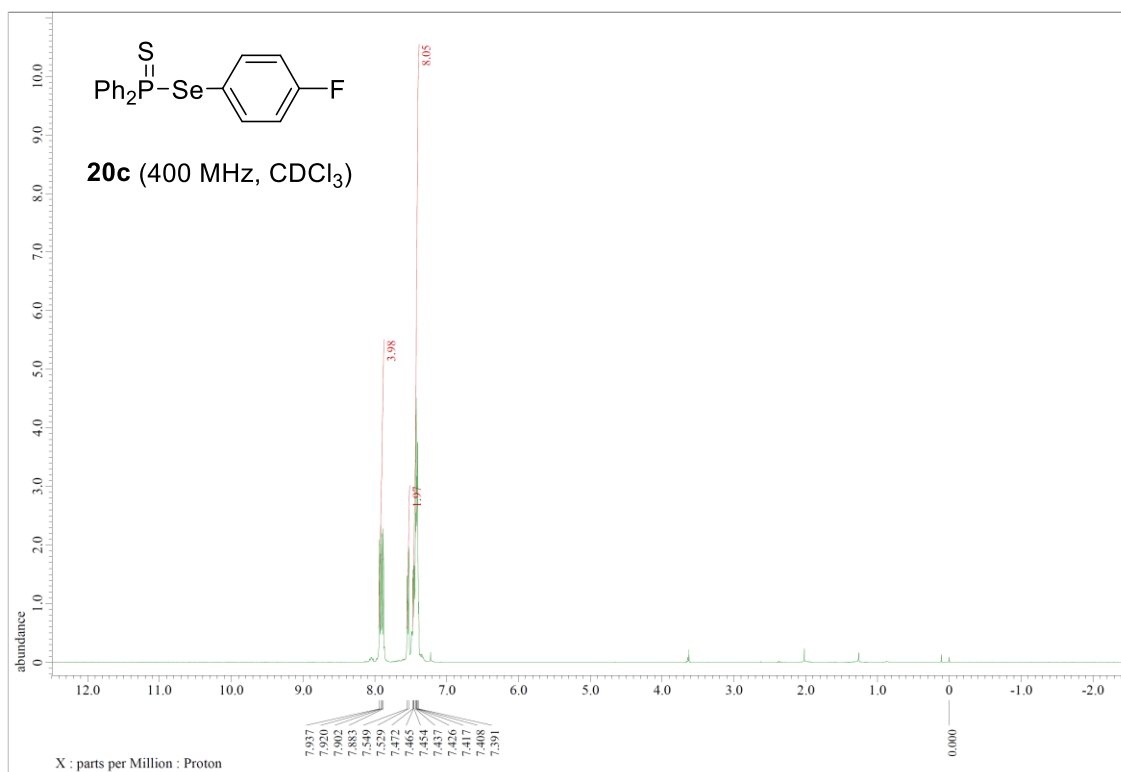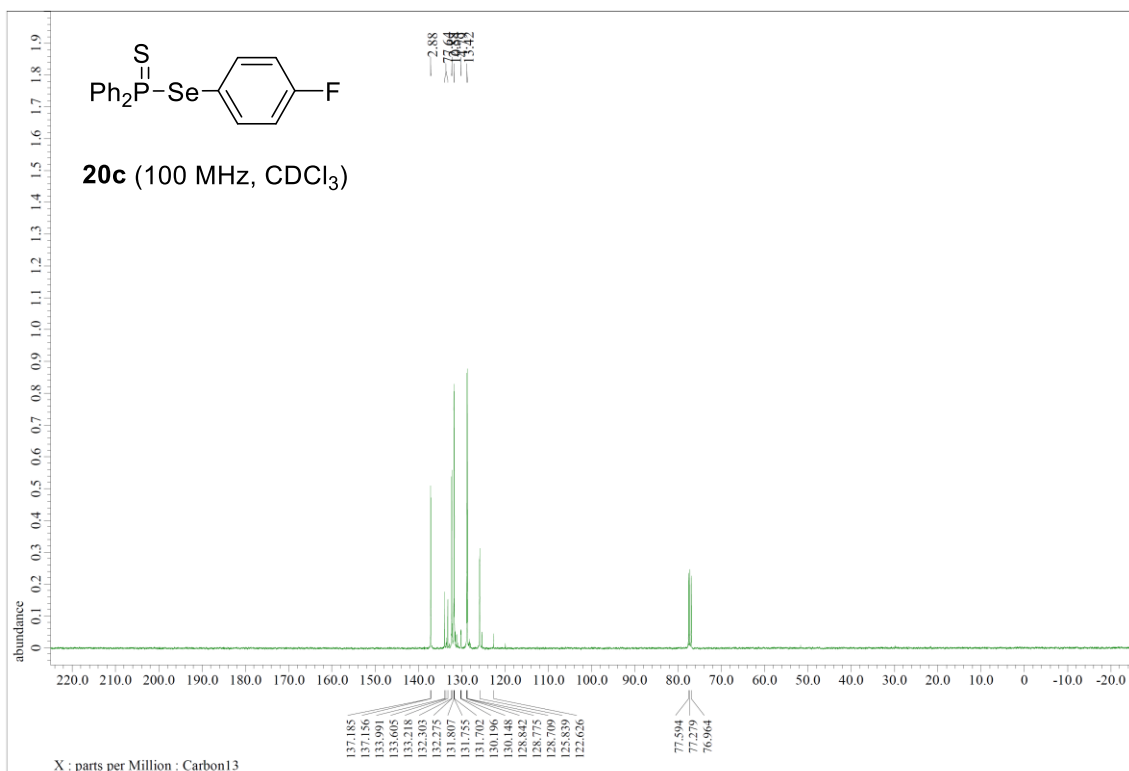

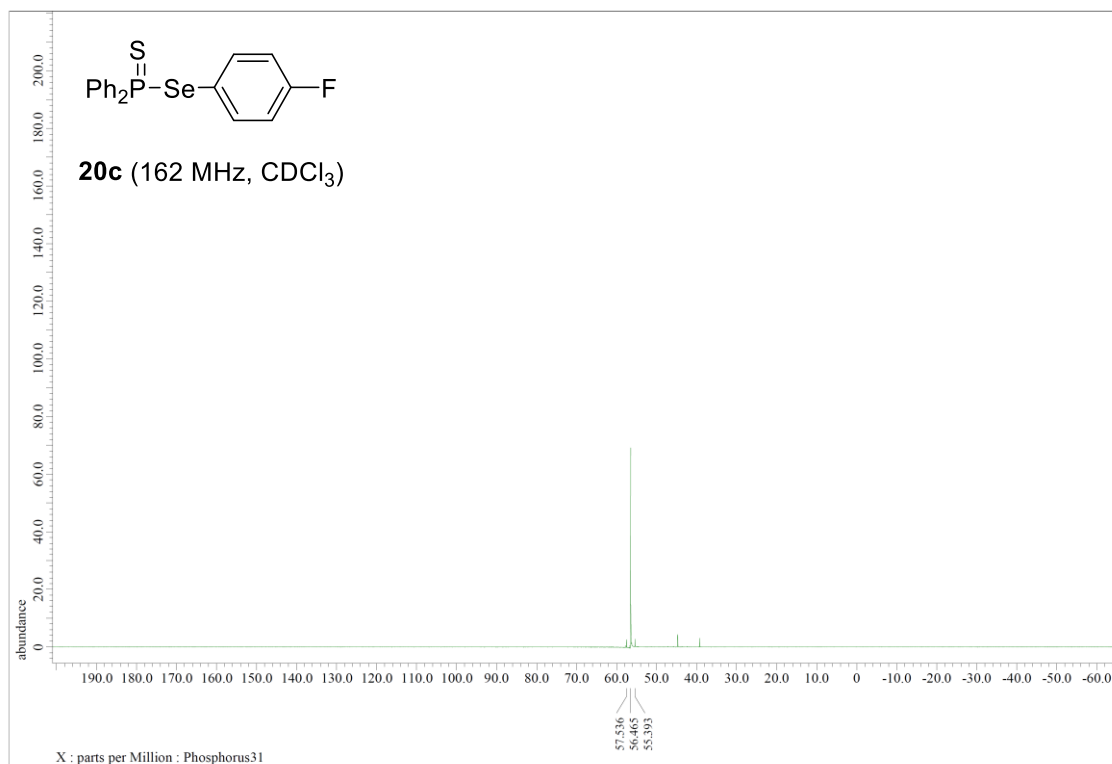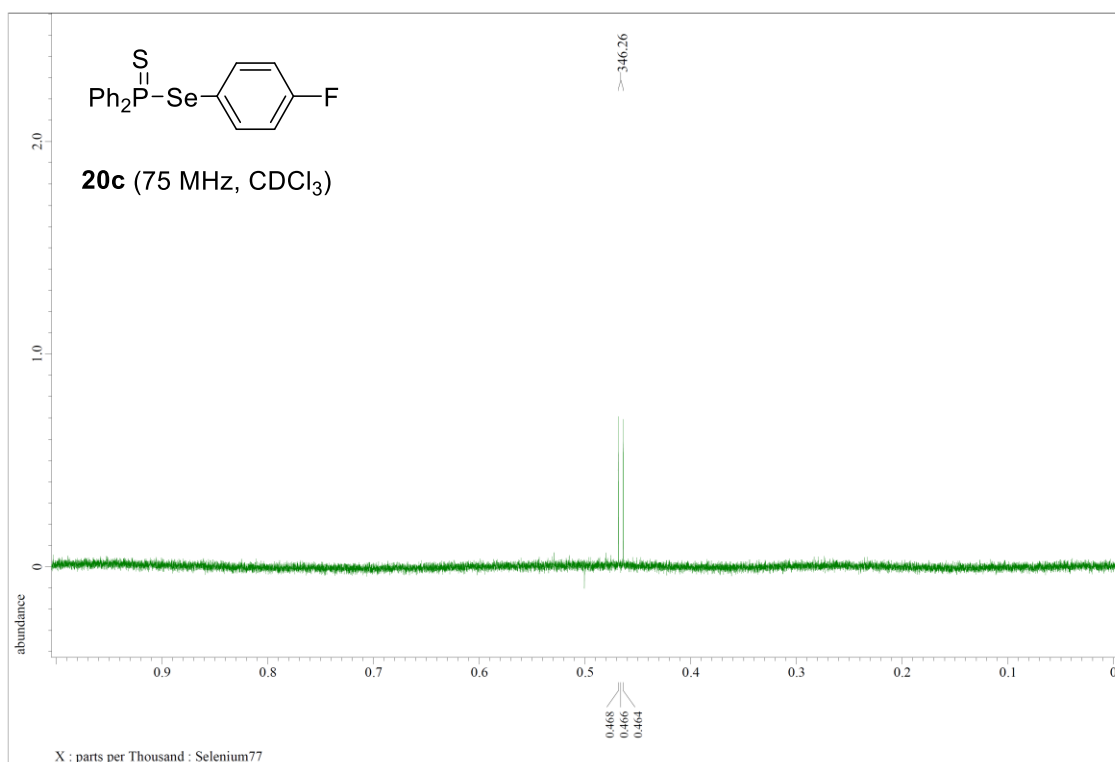

**Figure S9**  $^1\text{H}$ ,  $^{13}\text{C}$ ,  $^{31}\text{P}$ , and  $^{77}\text{Se}$  NMR spectra of compound **20d**

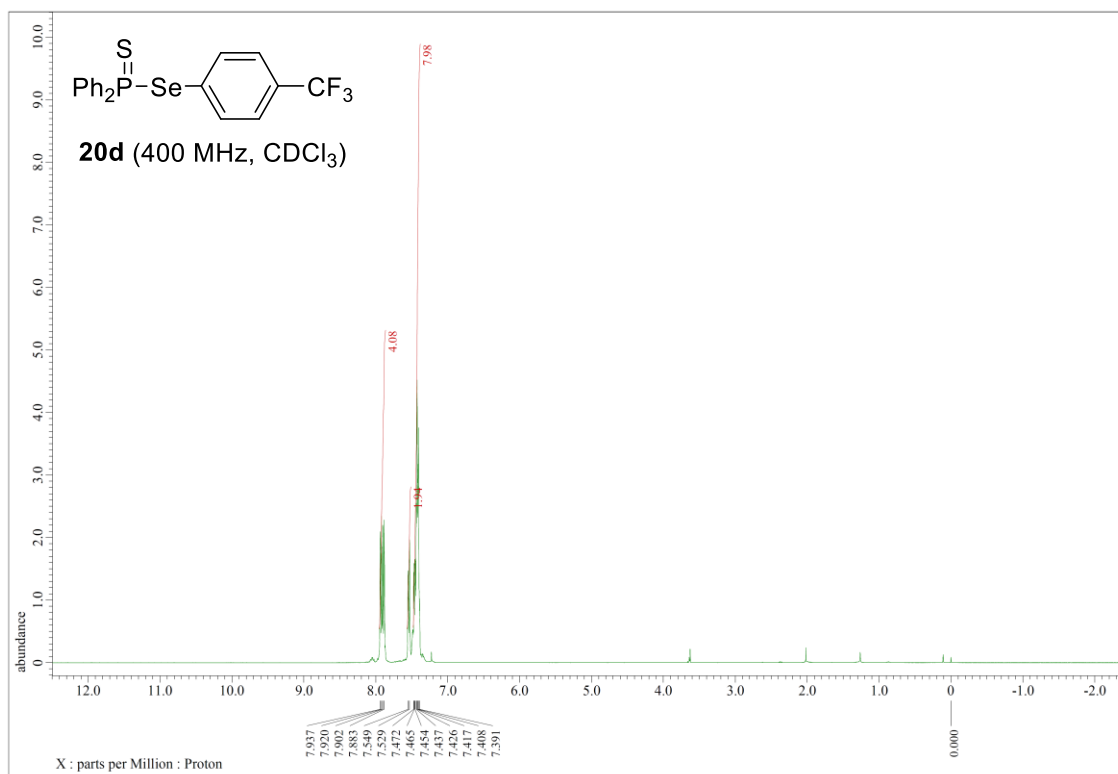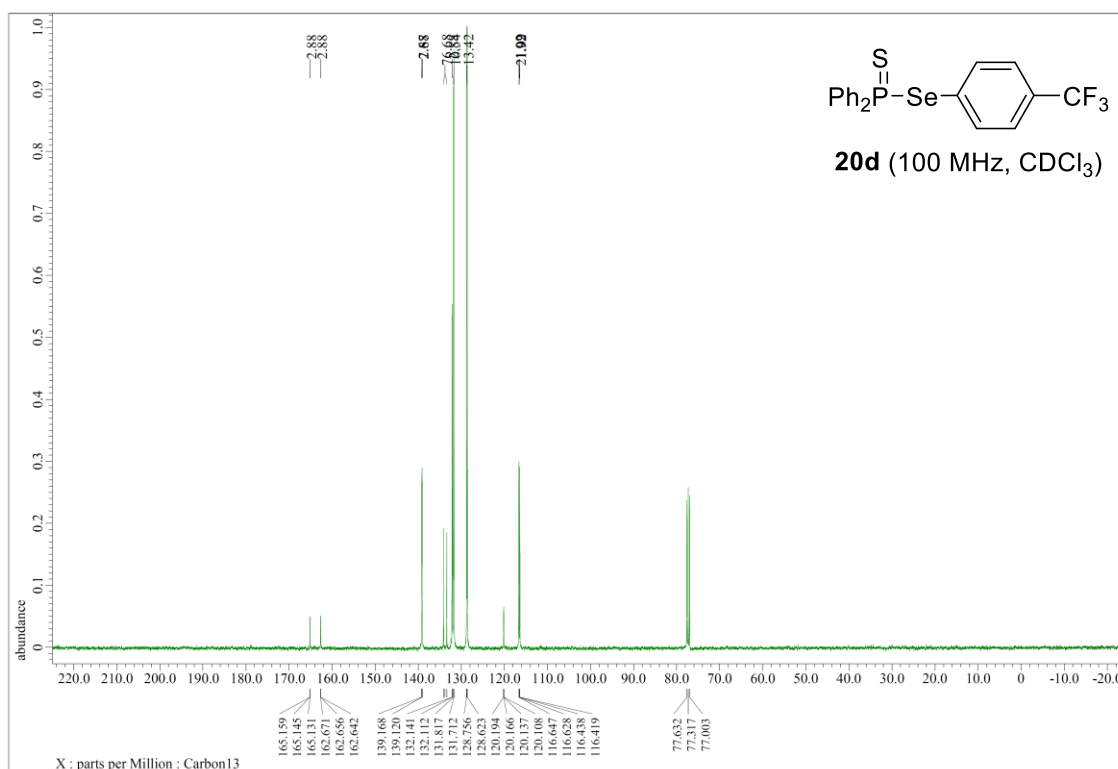

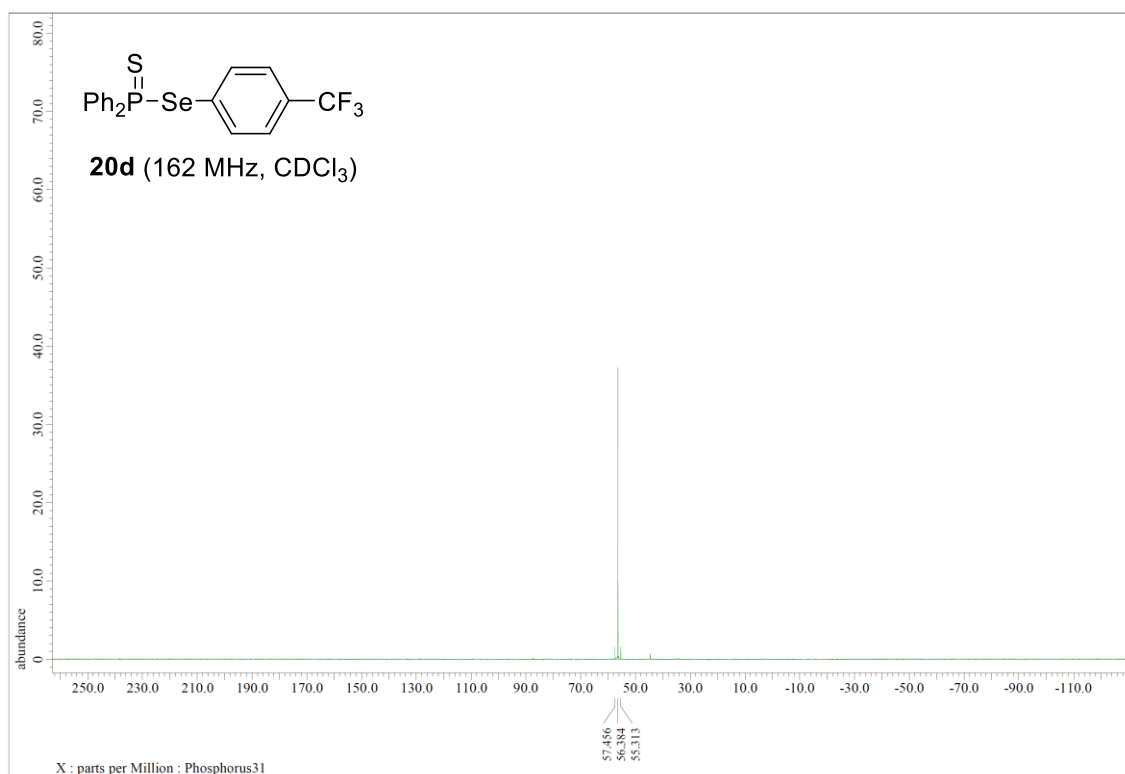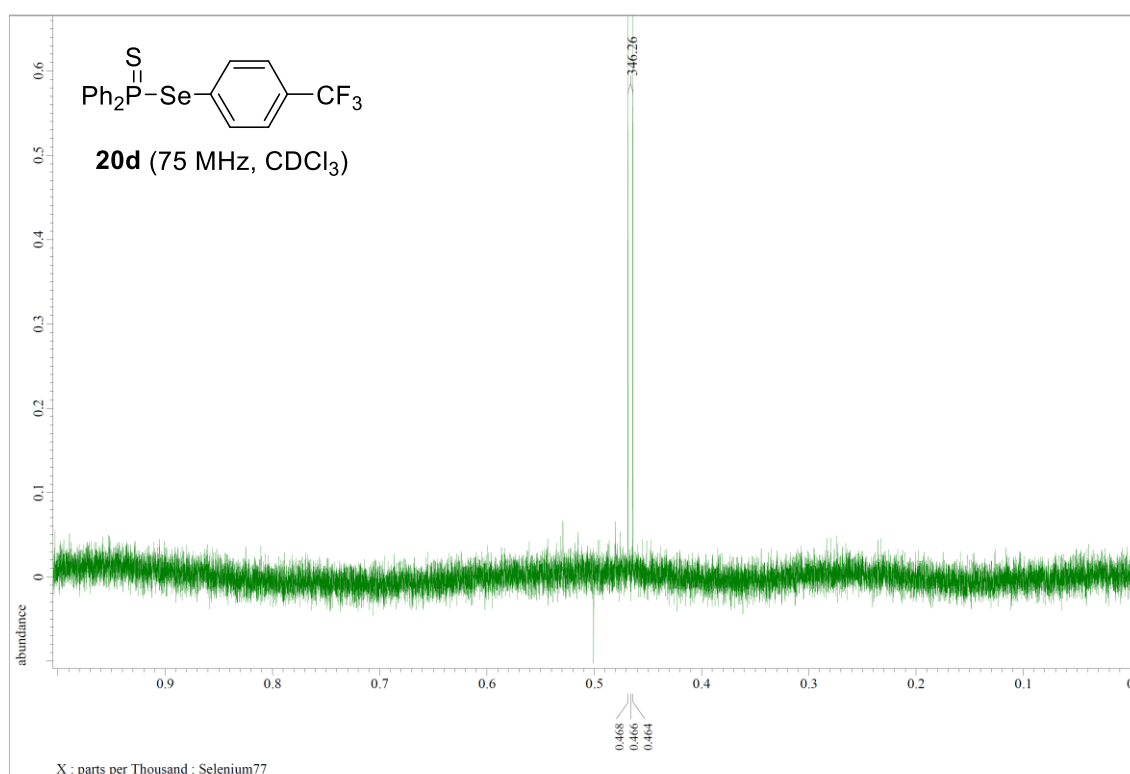

**Figure S10**  $^1\text{H}$ ,  $^{13}\text{C}$ ,  $^{31}\text{P}$ , and  $^{77}\text{Se}$  NMR spectra of compound **20e**

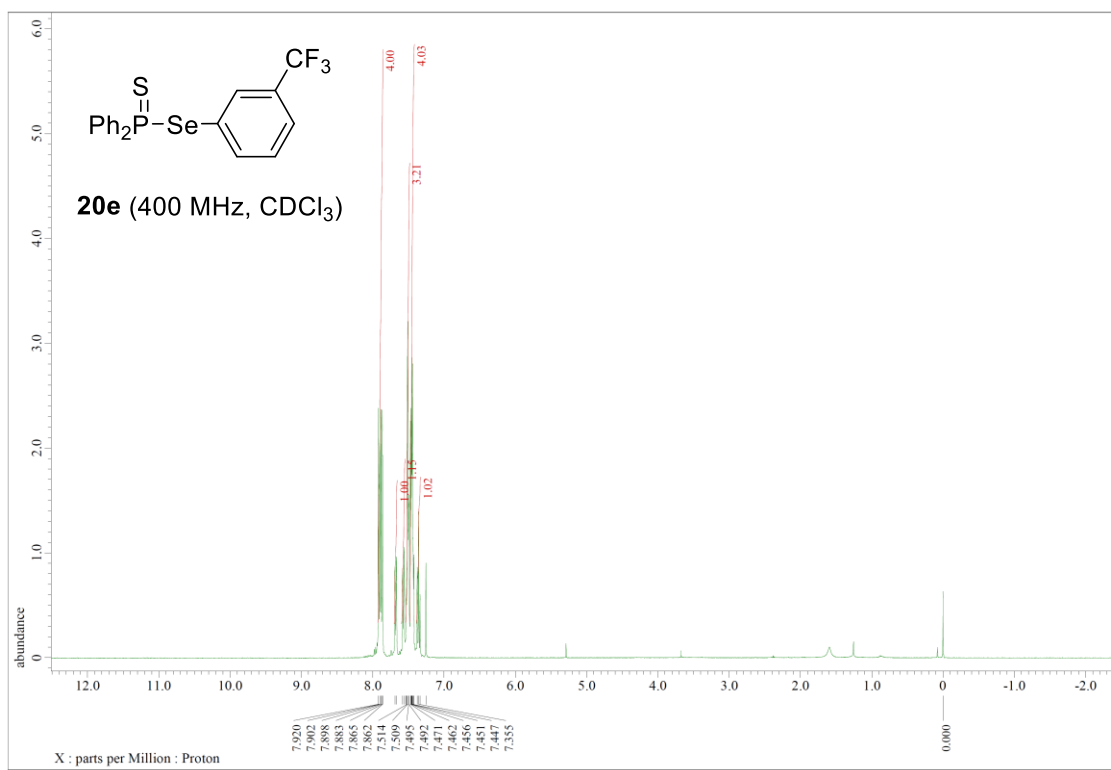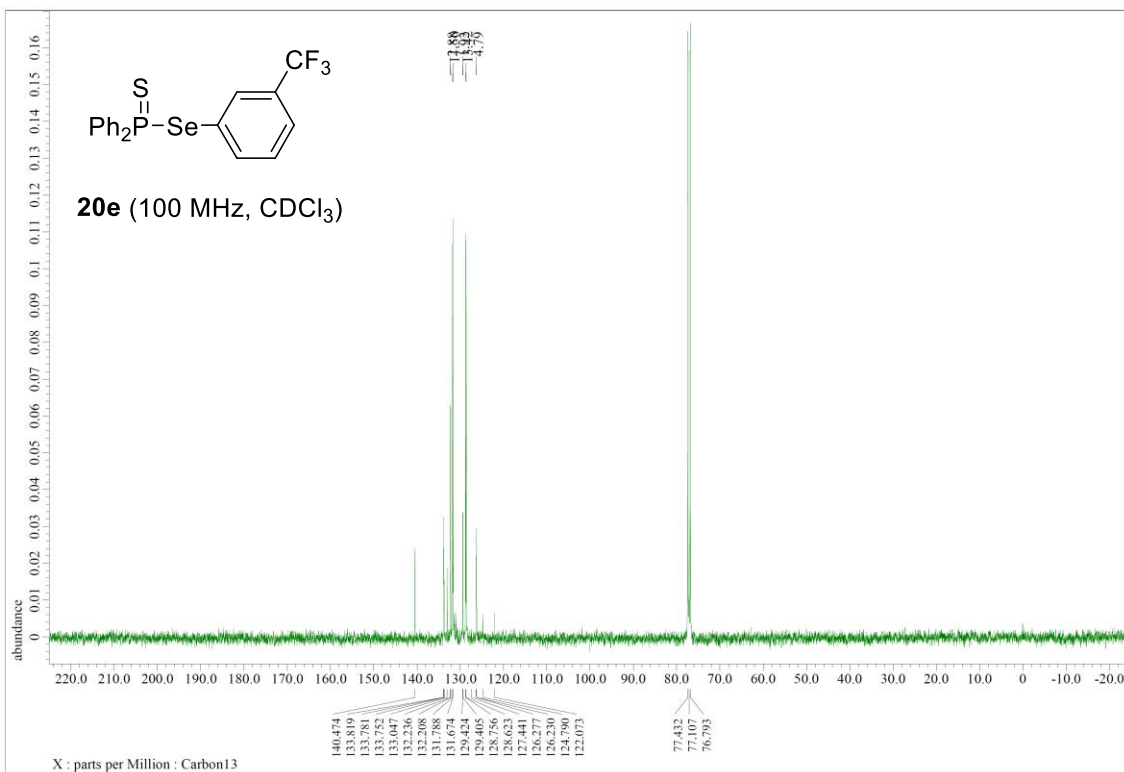

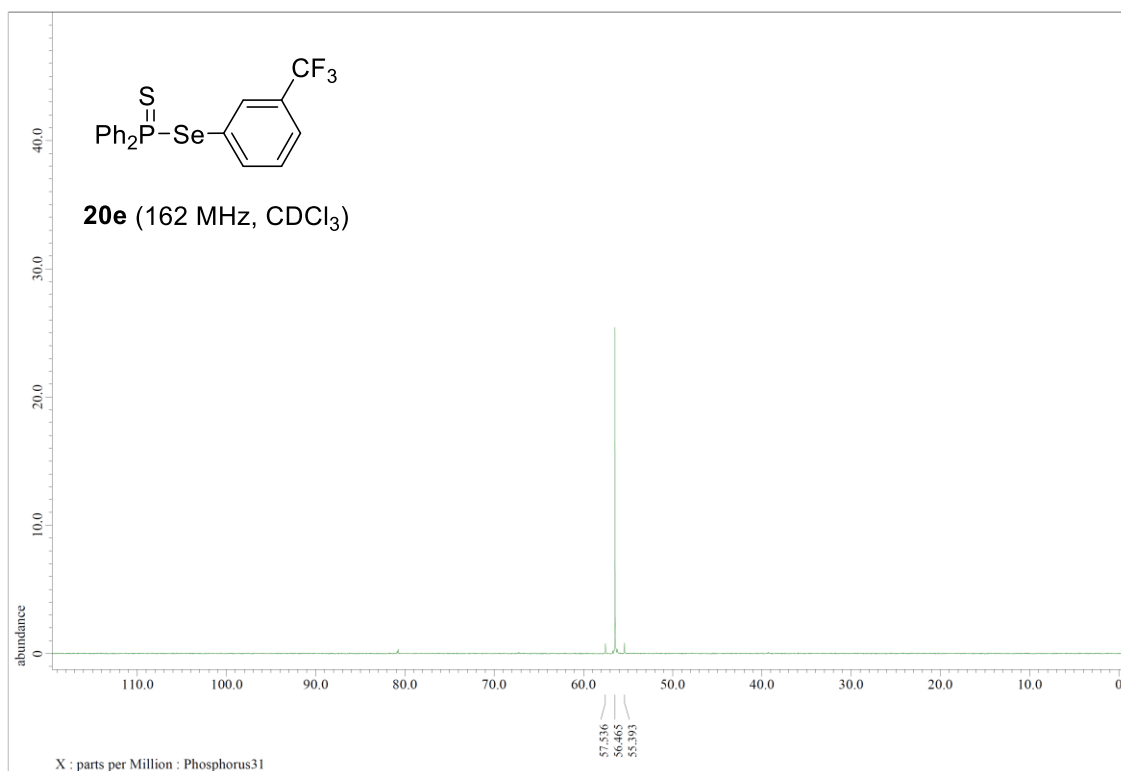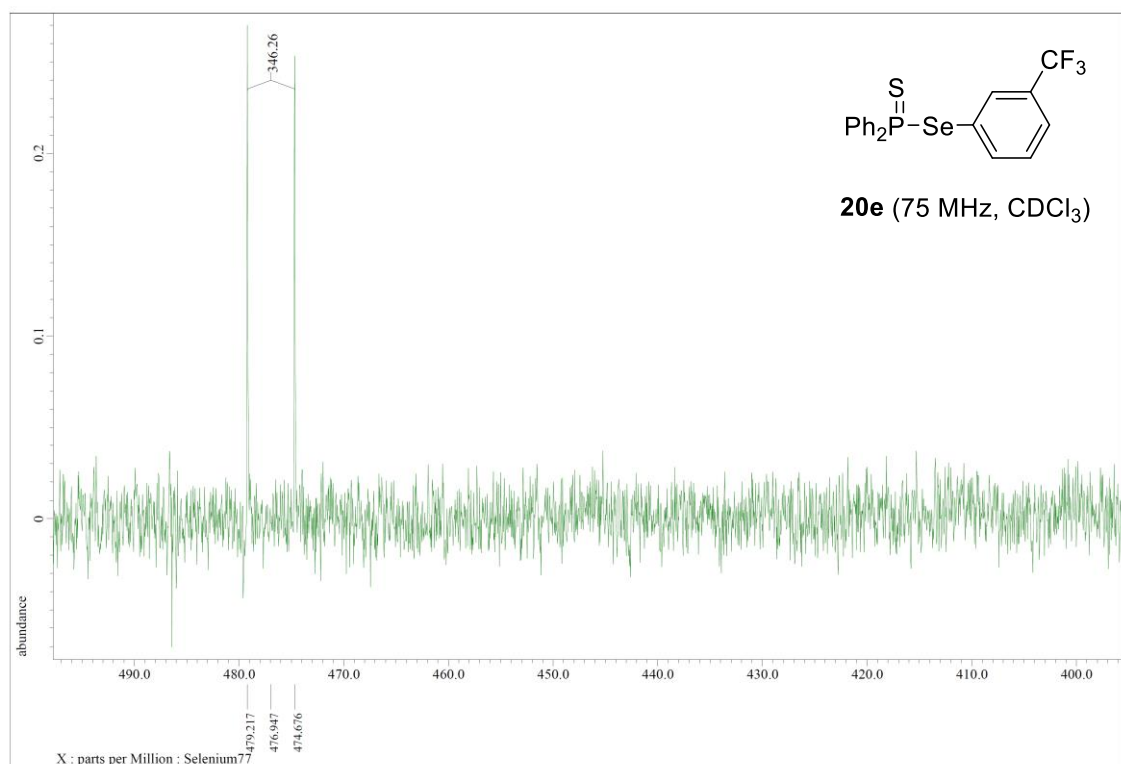

**Figure S11**  $^1\text{H}$ ,  $^{13}\text{C}$ ,  $^{31}\text{P}$ , and  $^{77}\text{Se}$  NMR spectra of compound **20f**

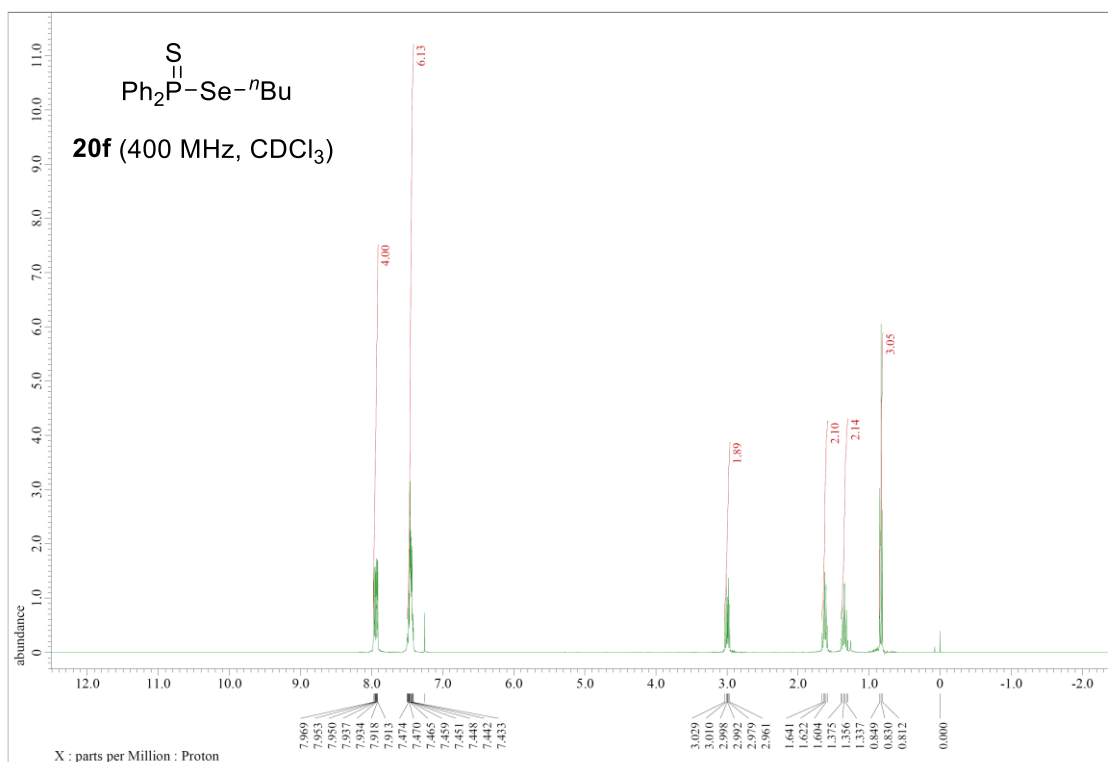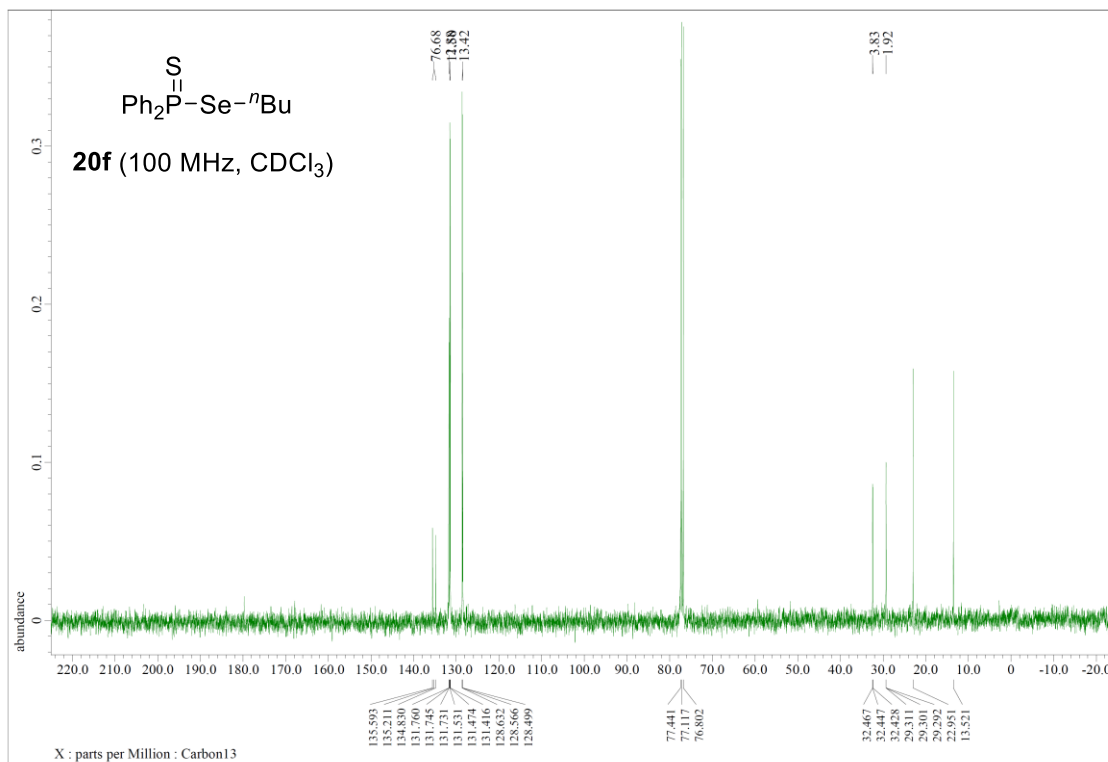

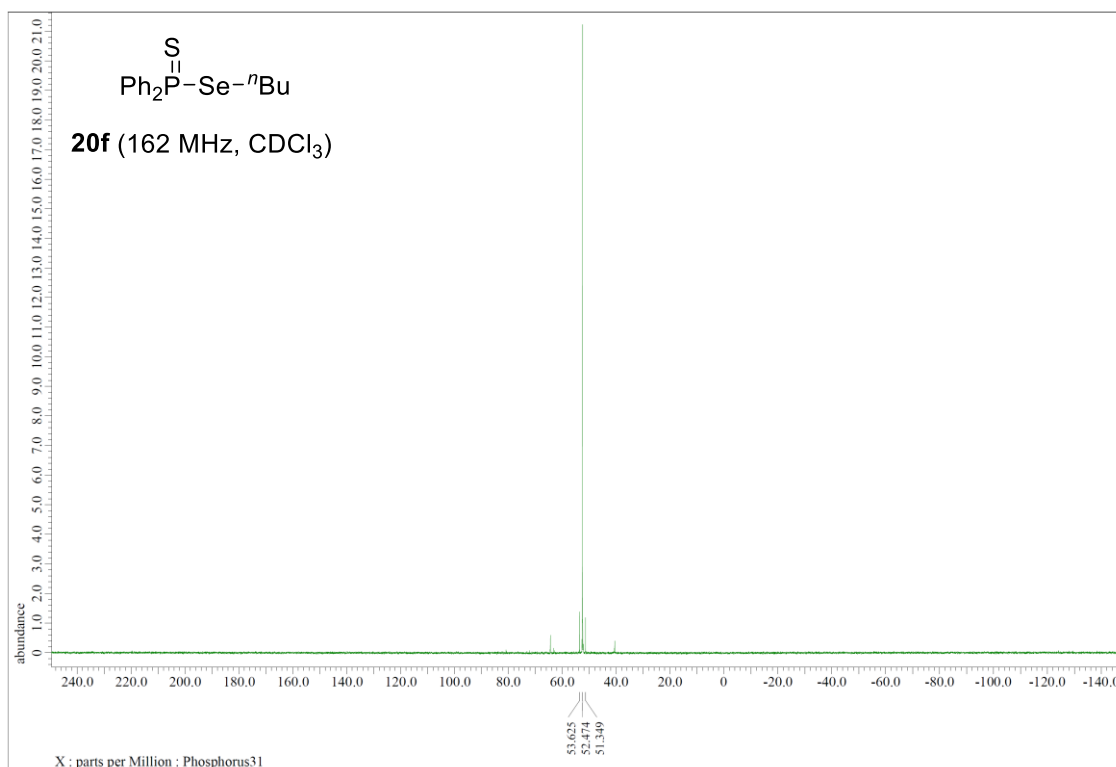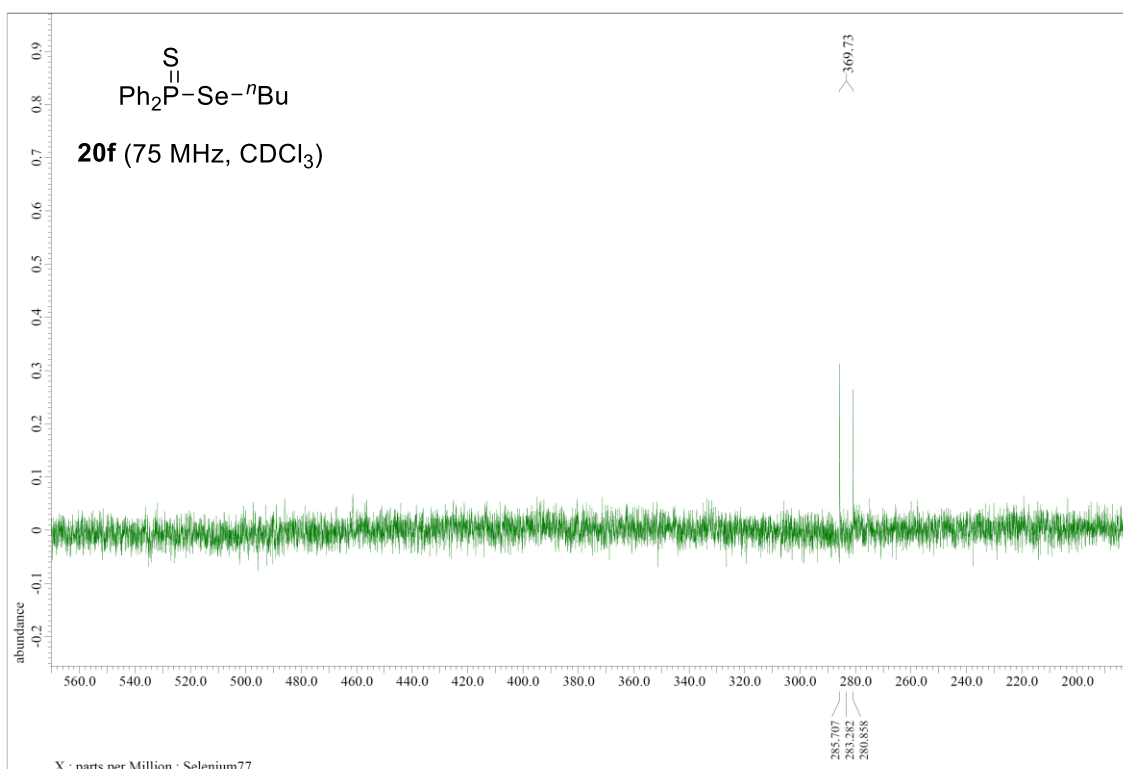



**Figure S12**  $^1\text{H}$ ,  $^{13}\text{C}$ , and  $^{31}\text{P}$  NMR spectra of compound **19f**

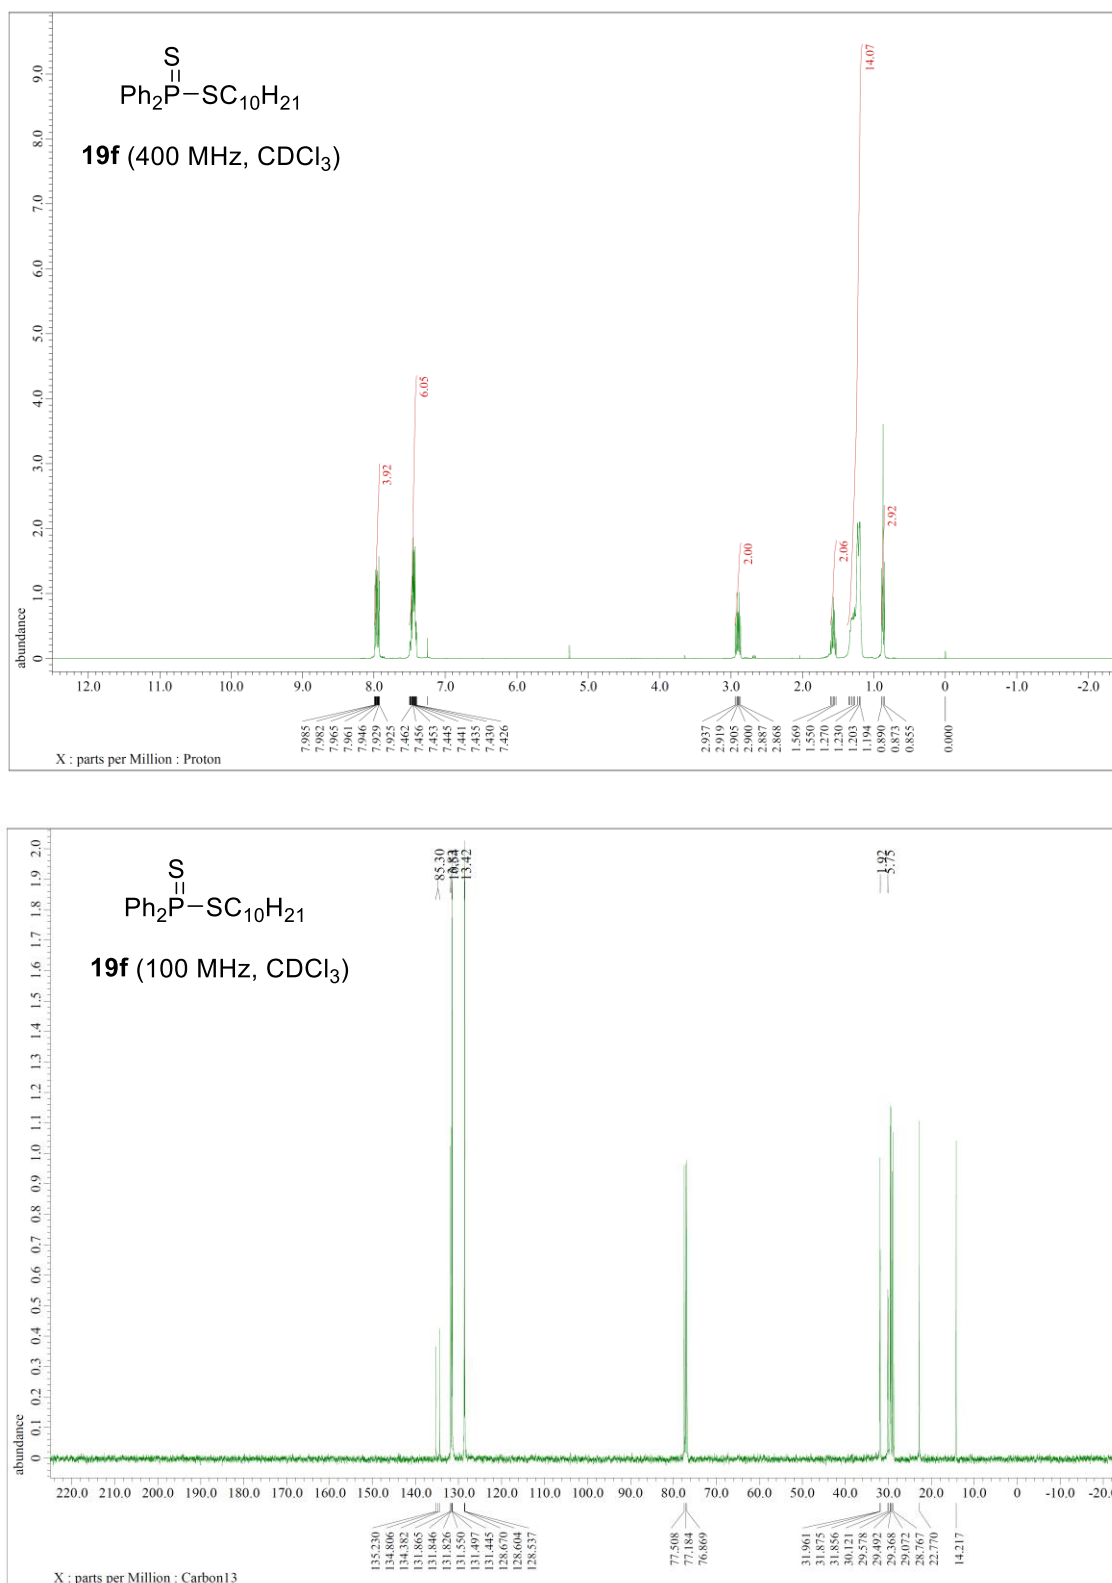

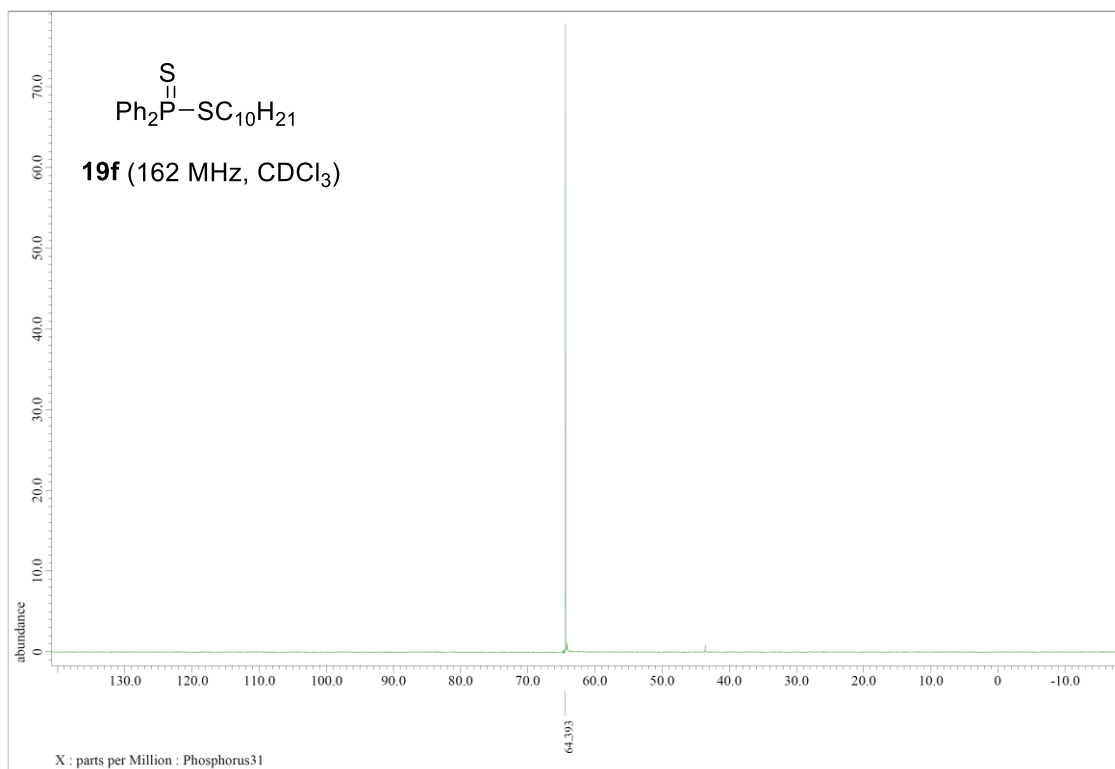

**Figure S13**  $^1\text{H}$  and  $^{13}\text{C}$  NMR spectra of compound **22**

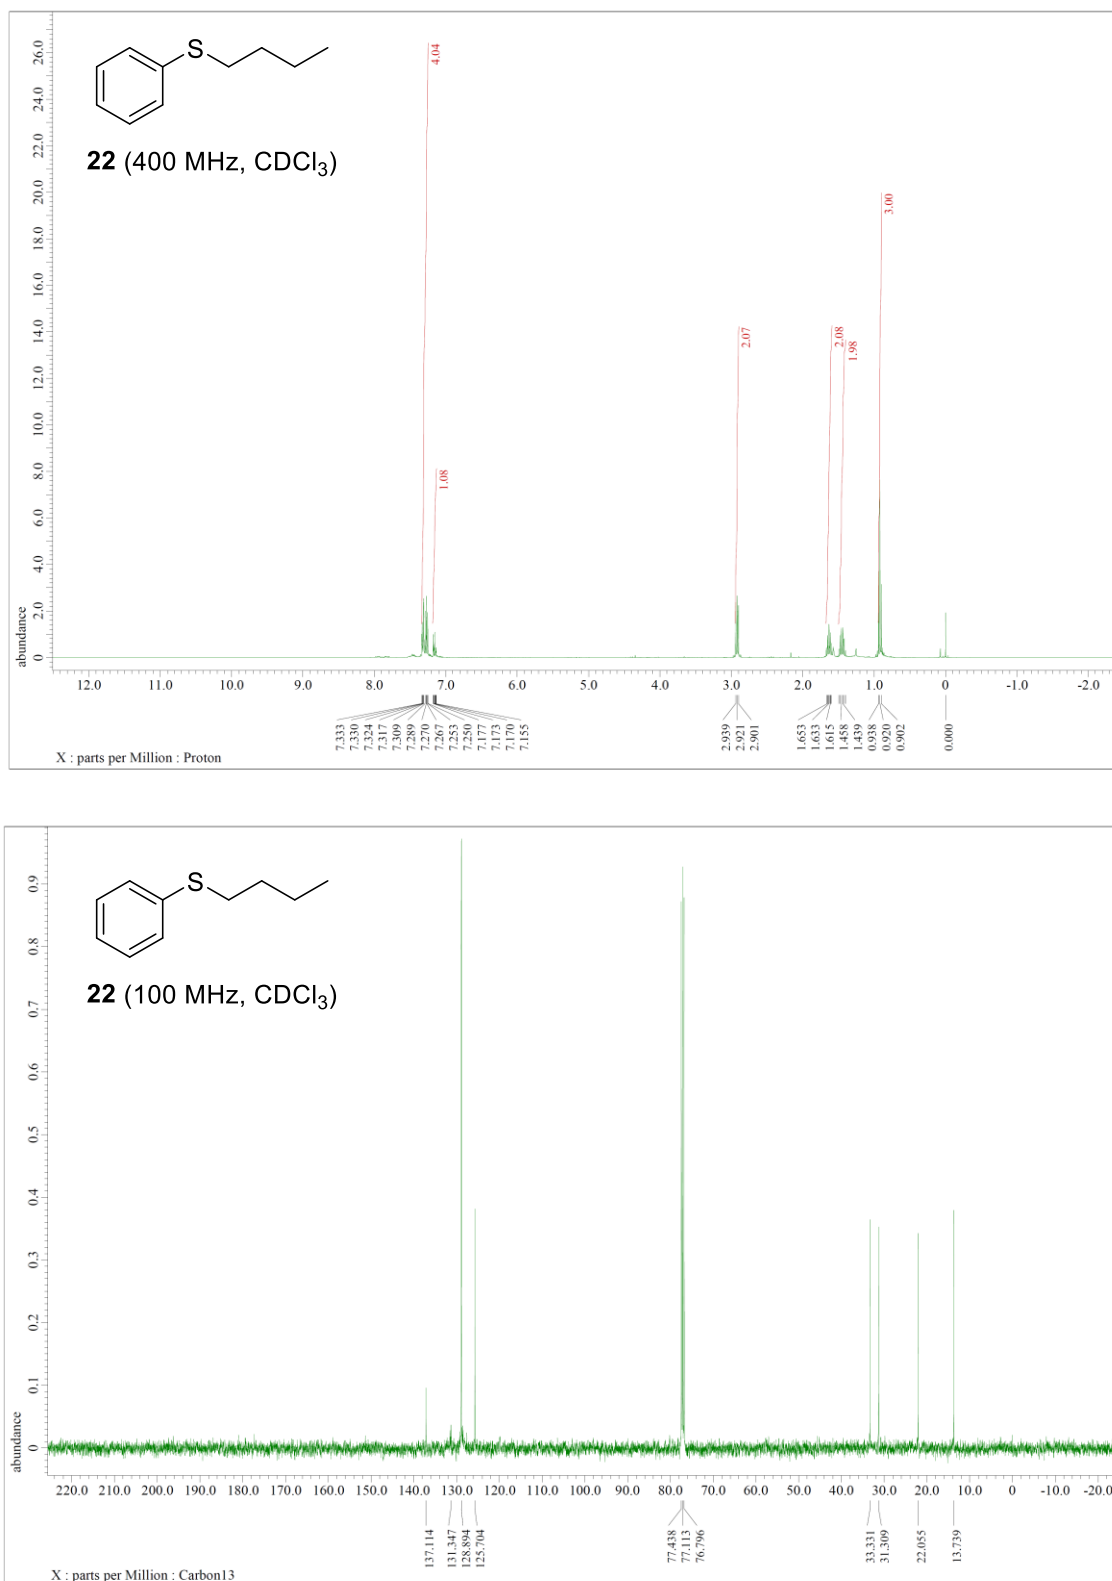

**Figure S14**  $^1\text{H}$ ,  $^{13}\text{C}$ , and  $^{77}\text{Se}$  NMR spectra of compound **23**

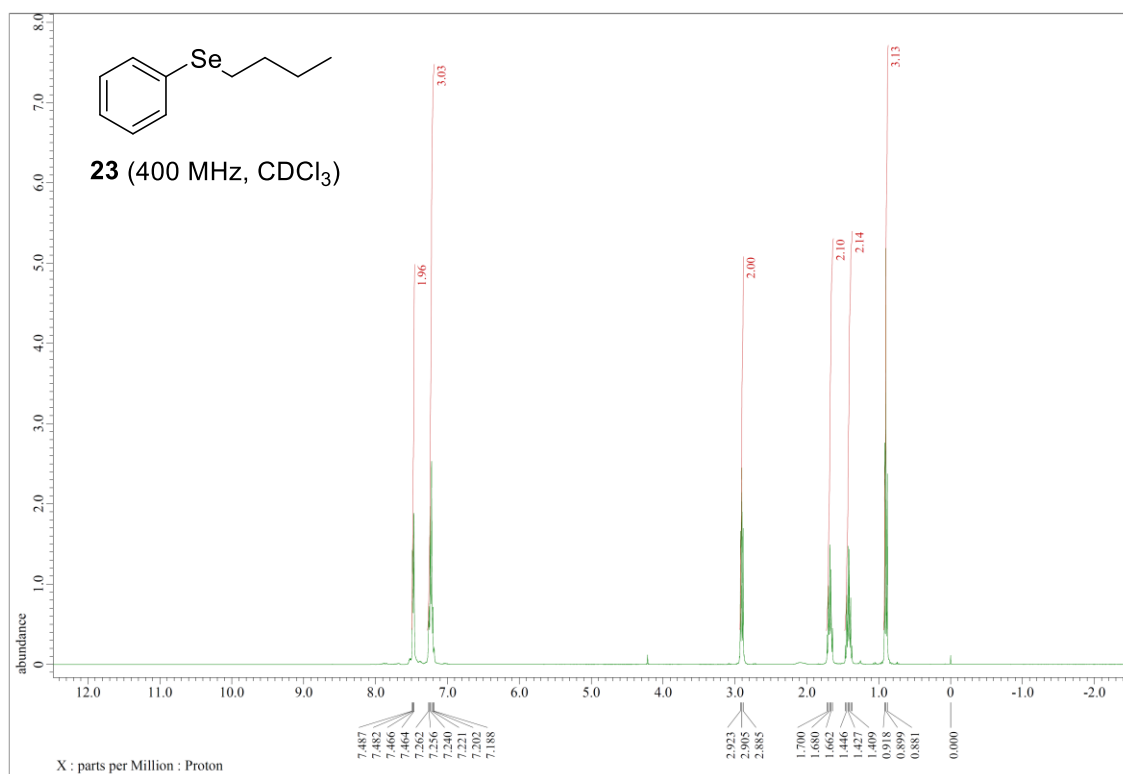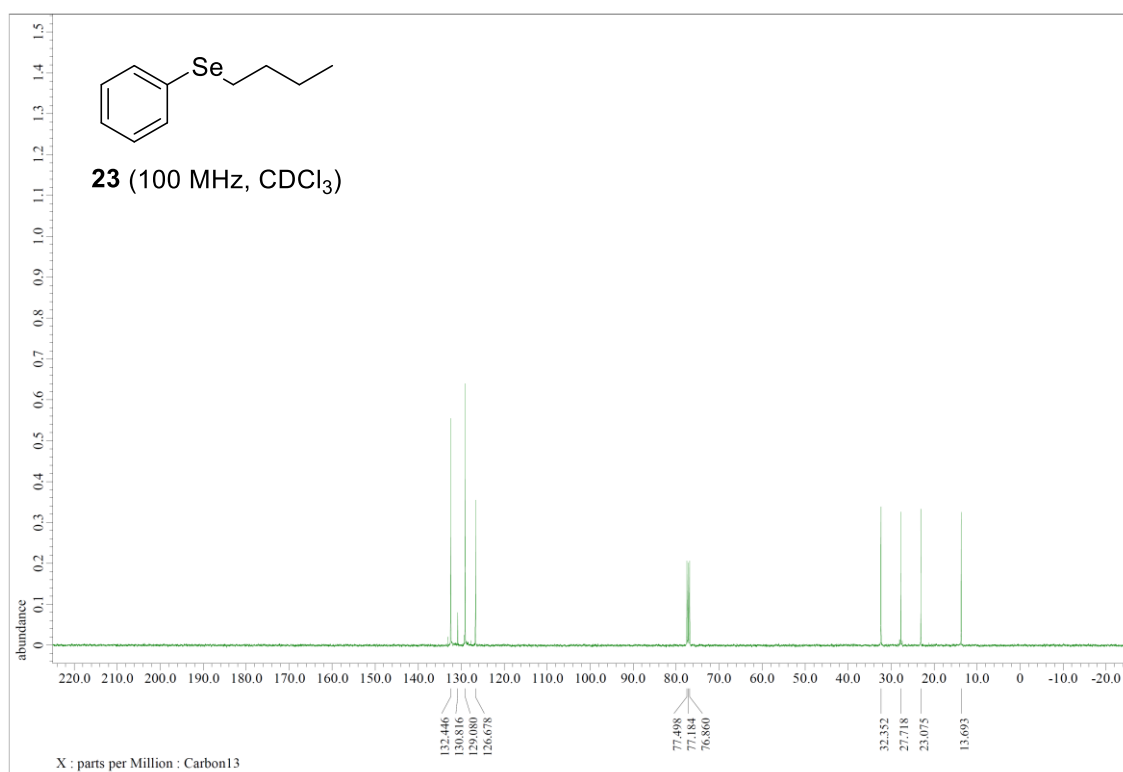

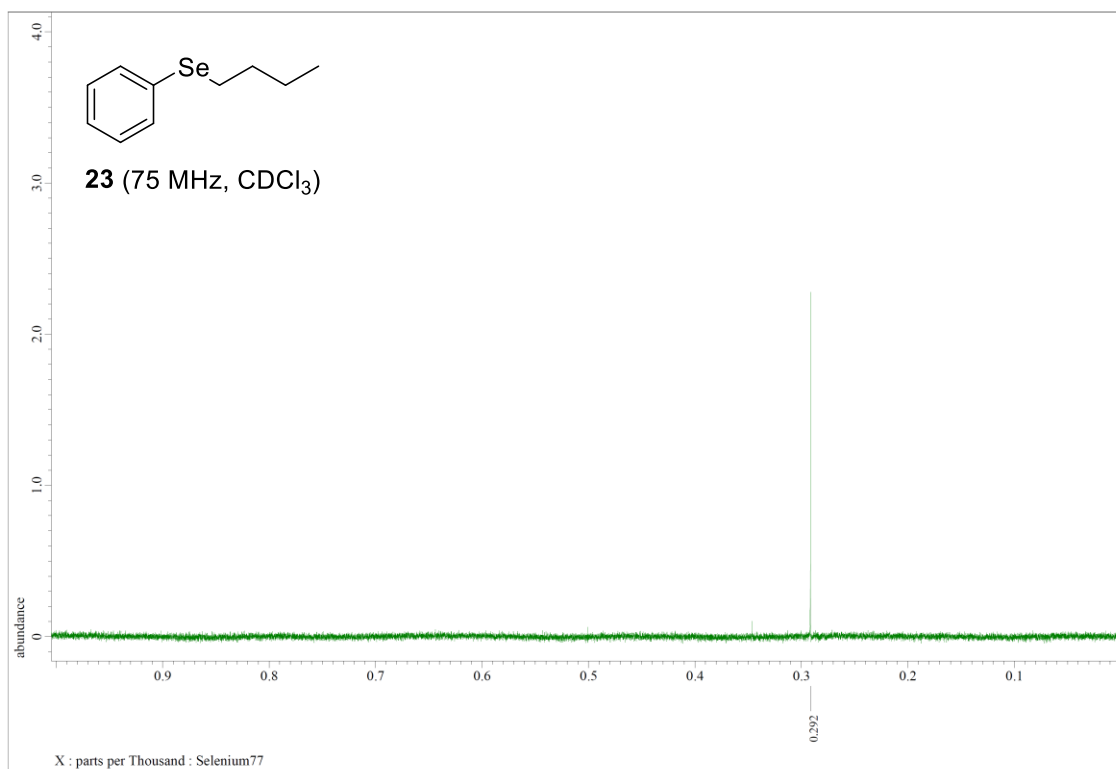

Supplement: Supplementary file 1 [file 25298535]
